# Supplementary material for: Synthesis and evaluation of novel F-18-labeled pyrimidine derivatives: potential FAK inhibitors and PET imaging agents for cancer detection
Source: Royal Society of Chemistry journal article supplement (doi:10.1039/c6ra28851k), 2017-01-01
Supplement: c6ra28851k1.pdf [file c6ra28851k1.pdf]

## Supporting Information

### **Synthesis and evaluation of novel F-18 labeled pyrimidine derivatives: Potential FAK inhibitors and PET imaging agents for cancer detection**

Dawei Wang, Yu Fang, Hang Wang, Xingyu Xu, Jianping Liu and Huabei Zhang \*

Key Laboratory of Radiopharmaceuticals, Ministry of Education, College of Chemistry, Beijing  
Normal University, Beijing 100875, P. R. China.

Corresponding Author:

For H. Zhang: phone +86-10-58802012, E-mail [hbzhang@bnu.edu.cn](mailto:hbzhang@bnu.edu.cn).

<sup>1</sup>H NMR of 6a:

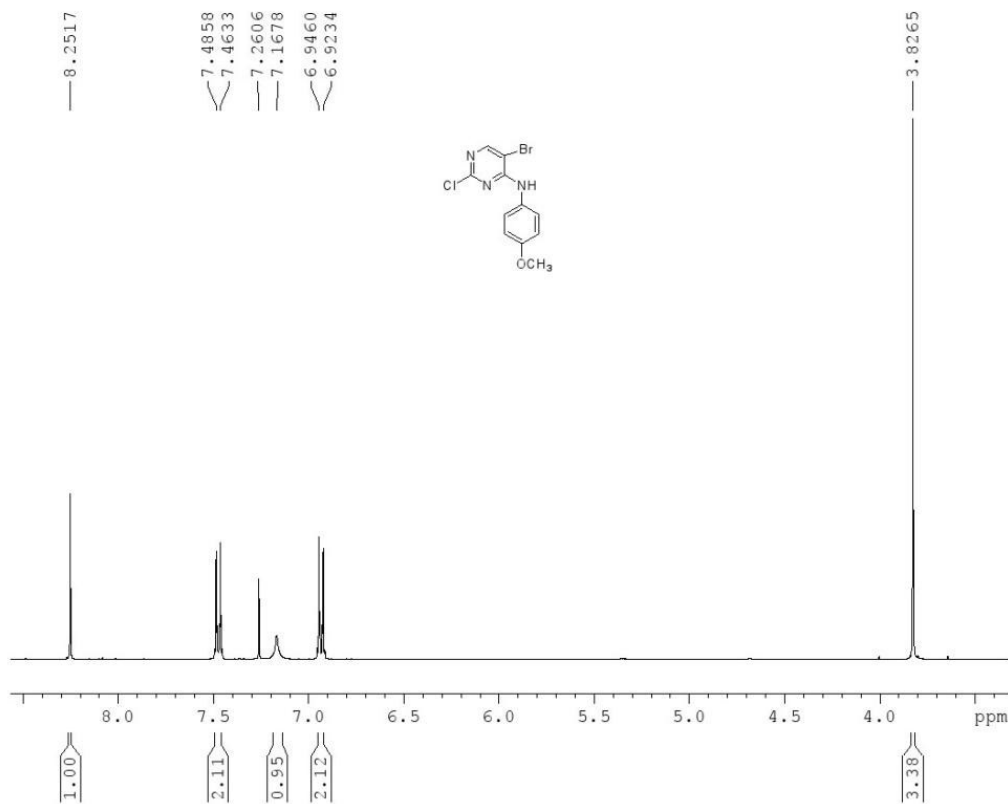

```

NAME      0010-xy-1
EXPNO     1
PROCNO    1
Date_     20160810
Time      11.37
INSTRUM   spect
PROBHD    5 mm PABBO BB-
PULPROG   zg30
TD         65536
SOLVENT   CDCl3
NS         22
DS         2
SWH        8222.605 Hz
FIDRES     0.125480 Hz
AQ         2.5286207 sec
RG         703
EM         60.800 usec
DE         6.50 usec
TE         300.0 K
D1         1.00000000 sec
TD0        1

===== CHANNEL f1 =====
NUC1       1H
P1         13.00 usec
PL1        0
PL1W       1.00 dB
PL1W       13.18669786 W
SFO1       400.174412 MHz
SI         32768
SF         400.17000220 MHz
WDW        EM
SSB        0
LB         0.20 Hz
GB         0
PC         1.00
    
```

# ESI-MS of 6a:

Acq. File: 20170317.wiff

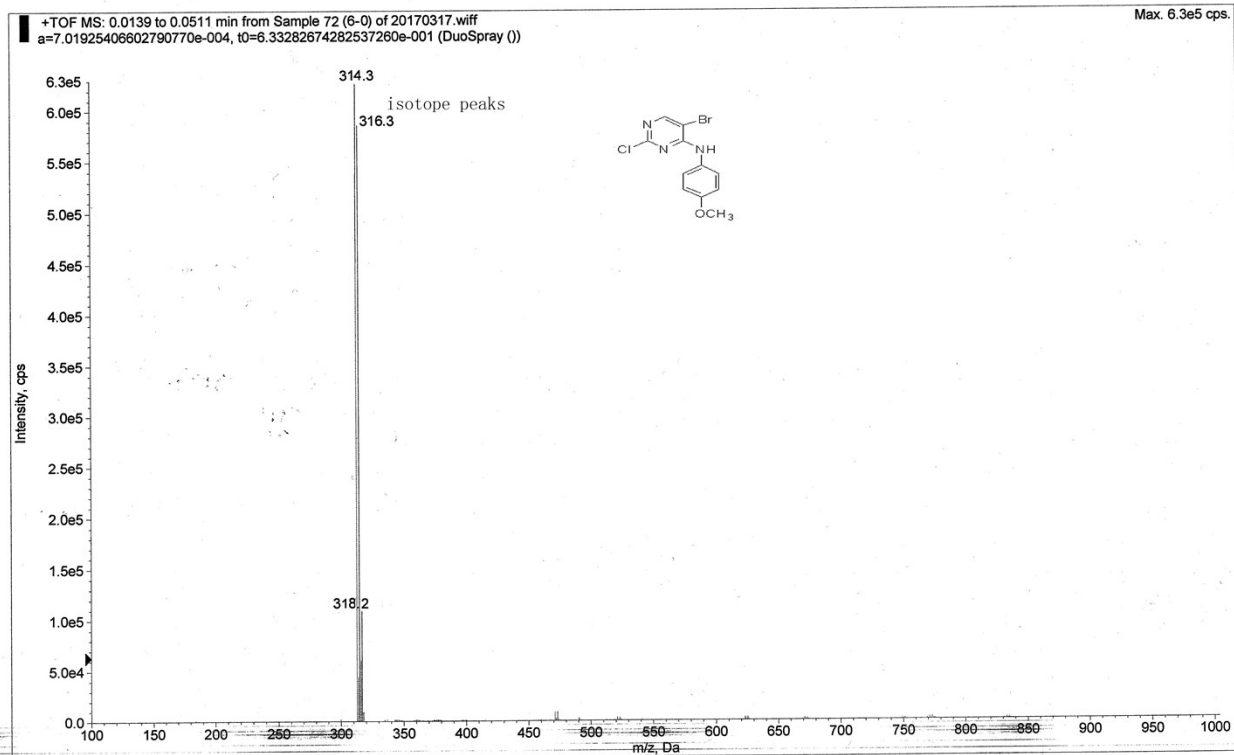

<sup>1</sup>H NMR of 6b:

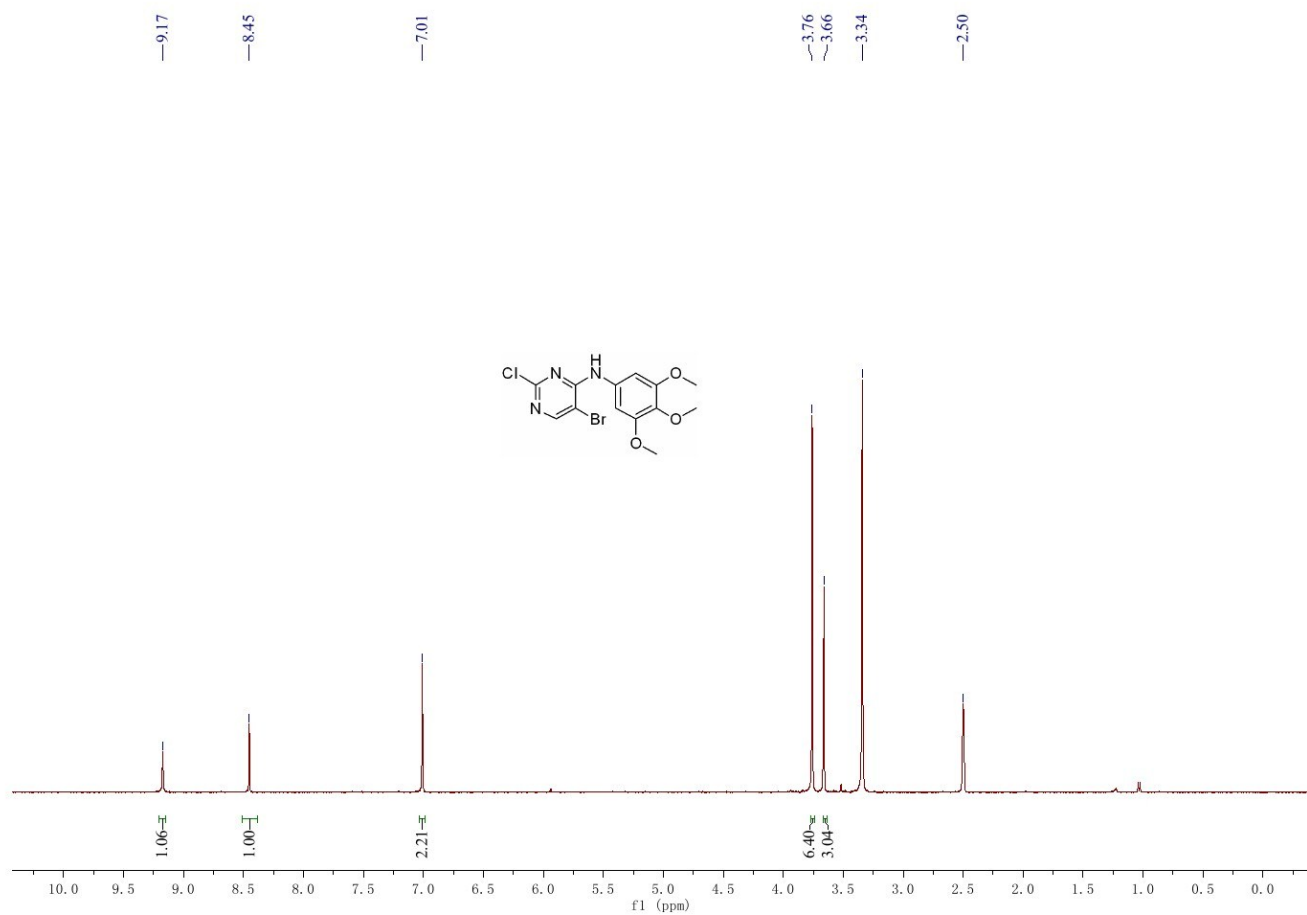

# ESI-MS of 6b:

Acq. File: 20170317.wiff

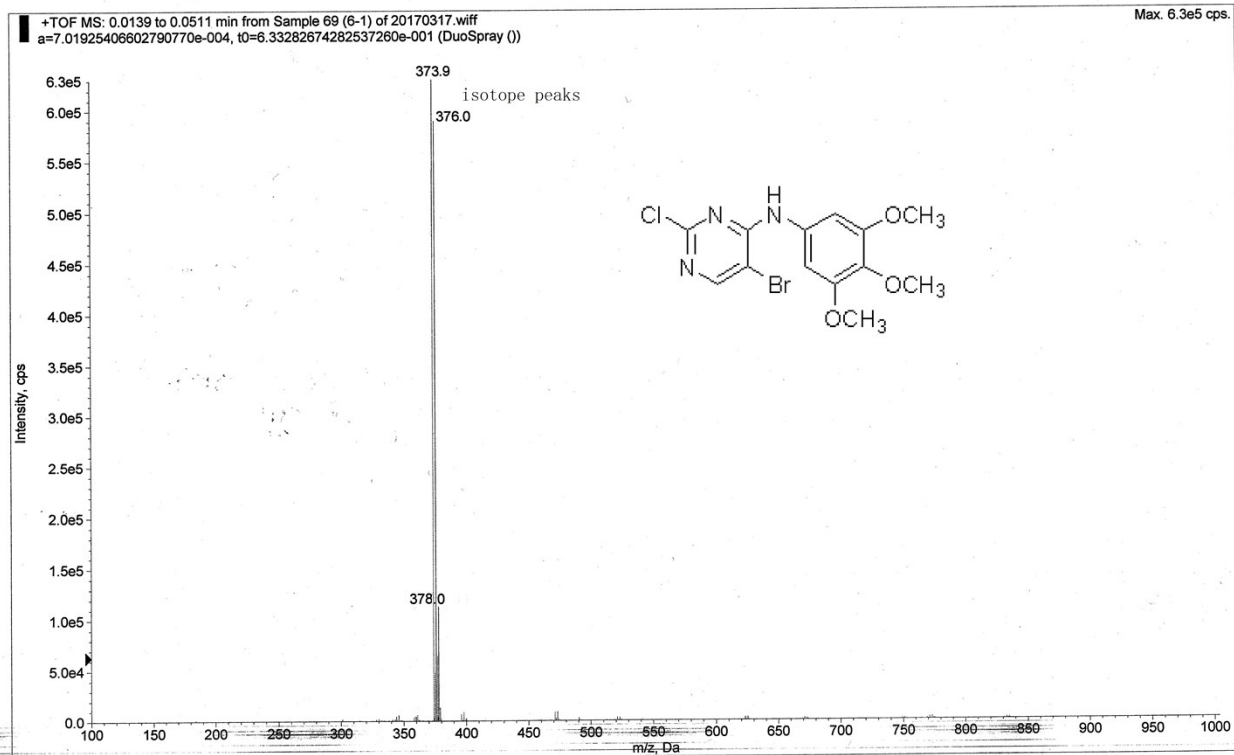

<sup>1</sup>H NMR of 6c:

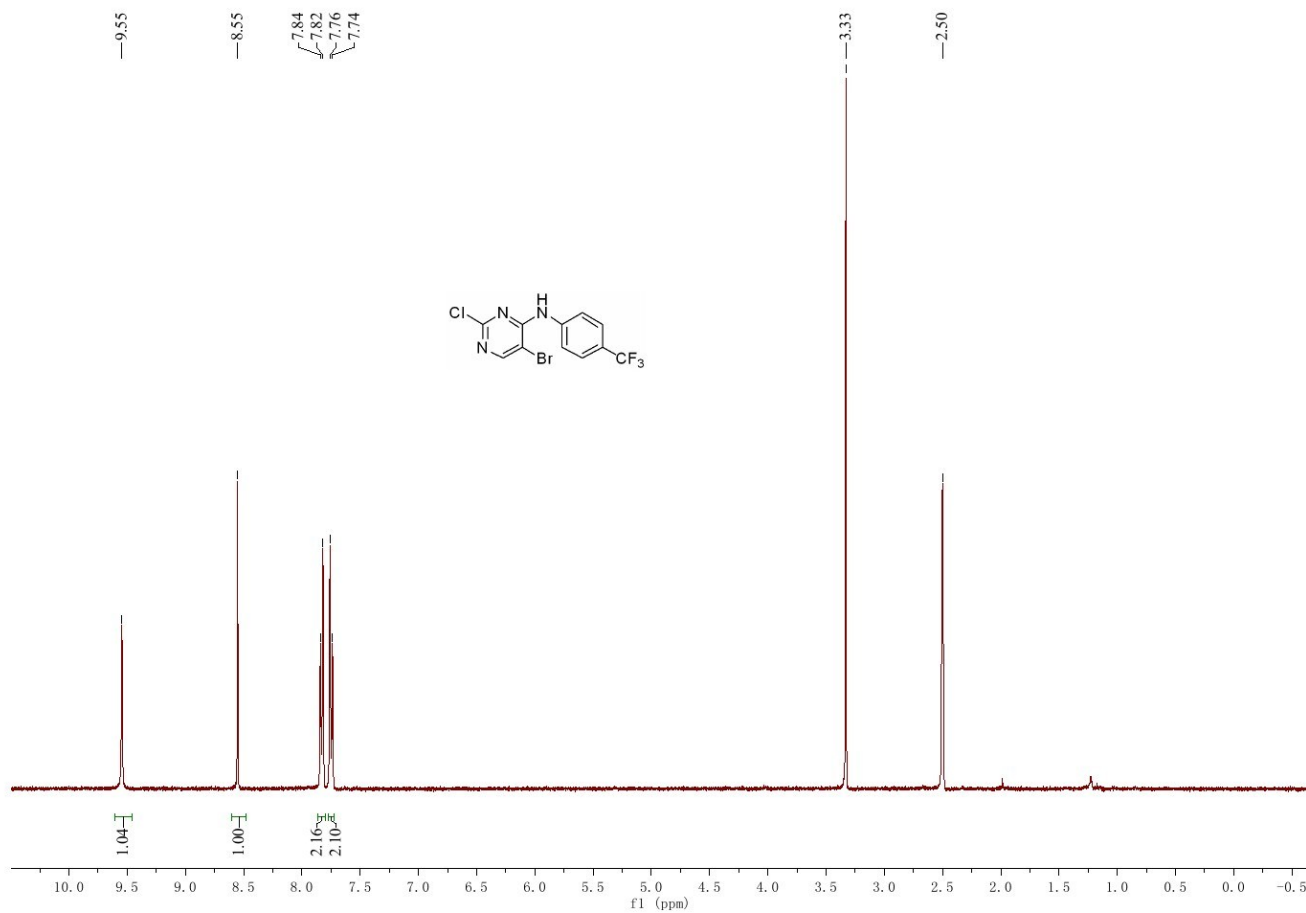

# ESI-MS of 6c:

Acq. File: 20170317.wiff

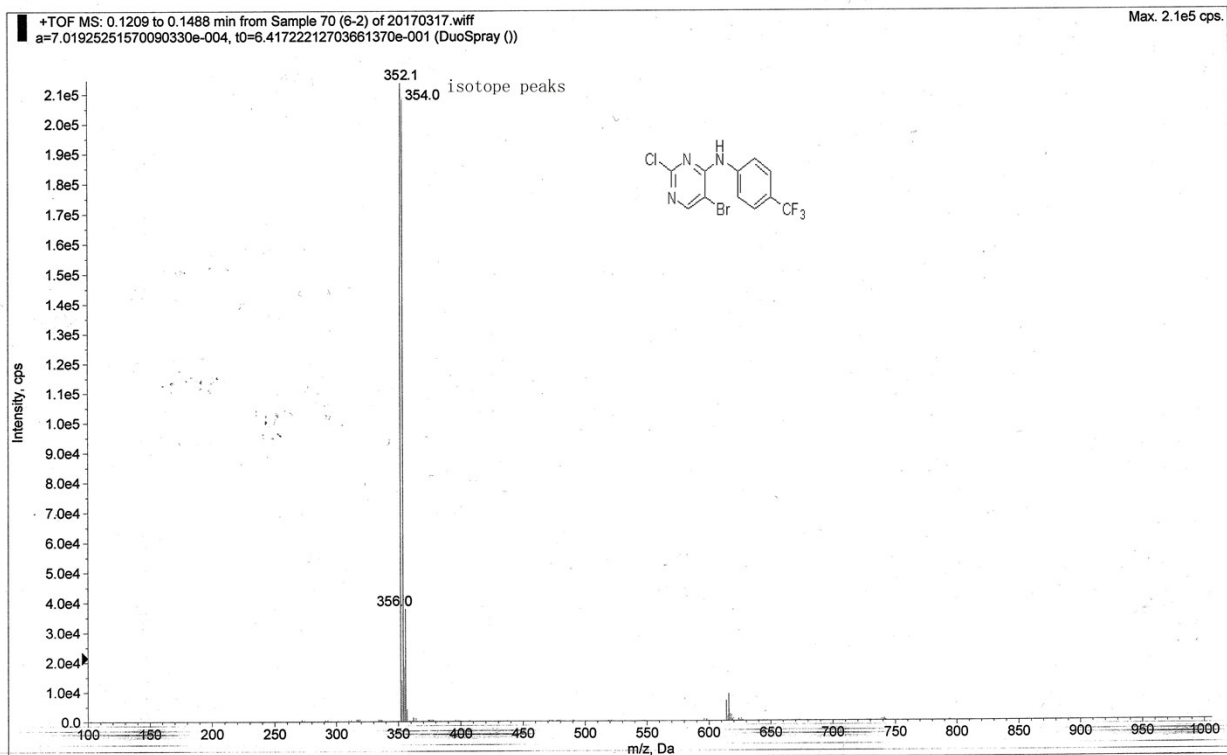

<sup>1</sup>H NMR of 6d:

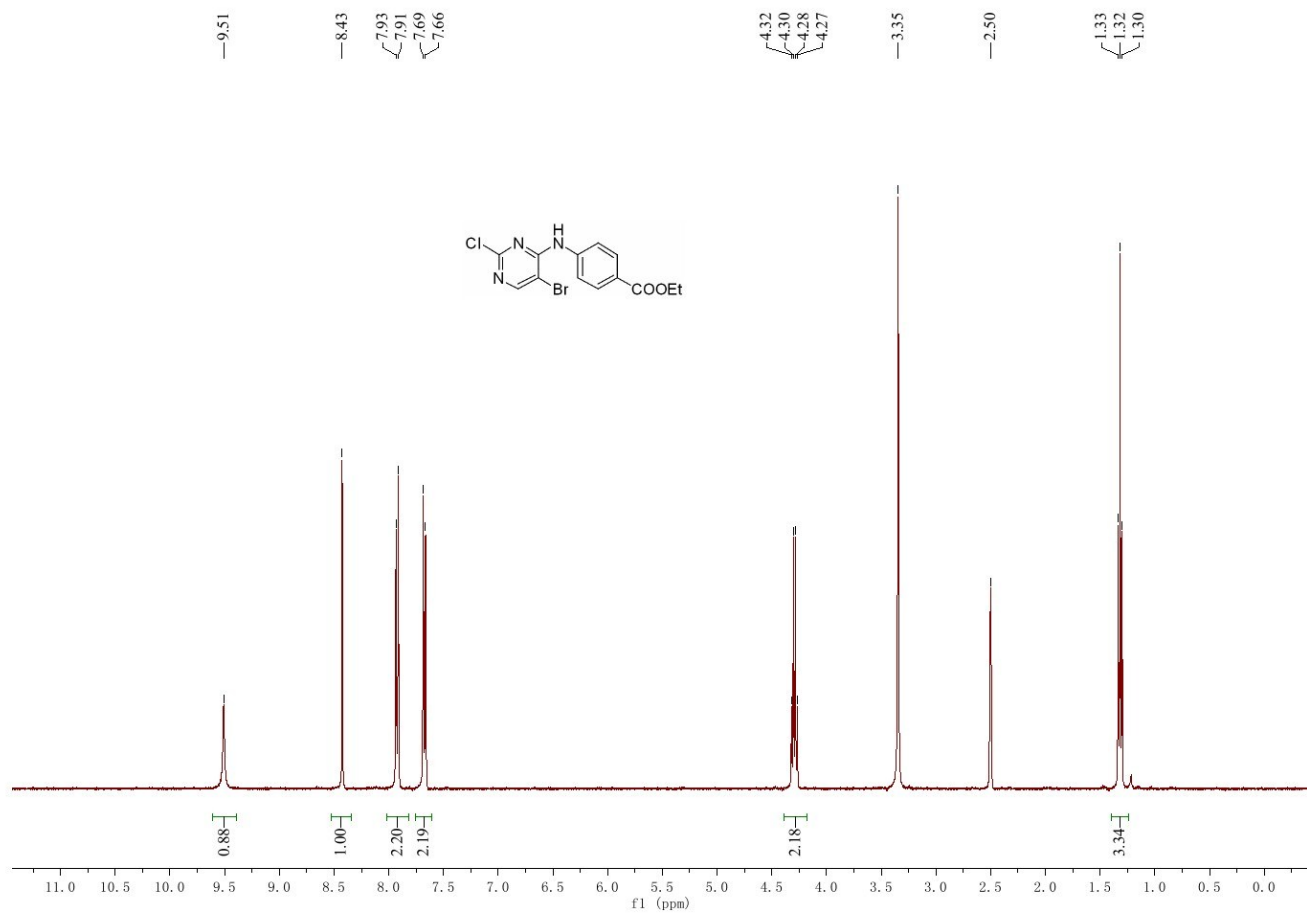



# ESI-MS of 6d:

Acq. File: 20170317.wiff

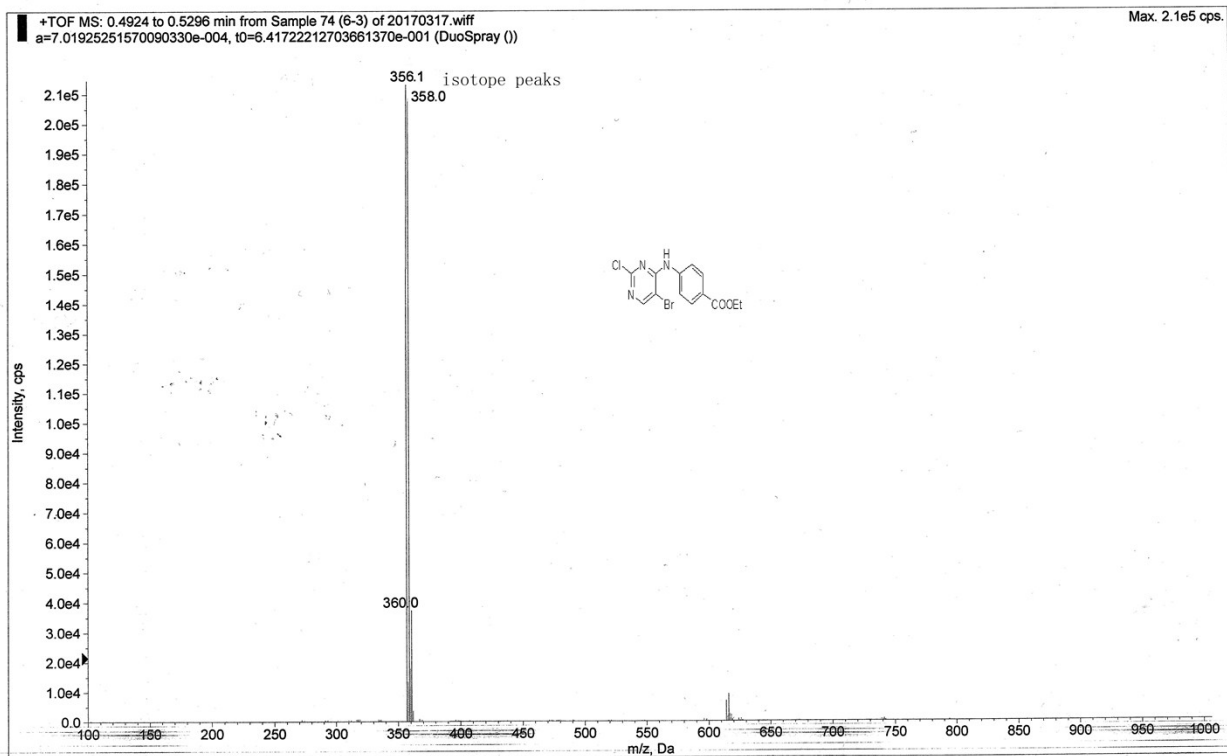

<sup>1</sup>H NMR of 7:

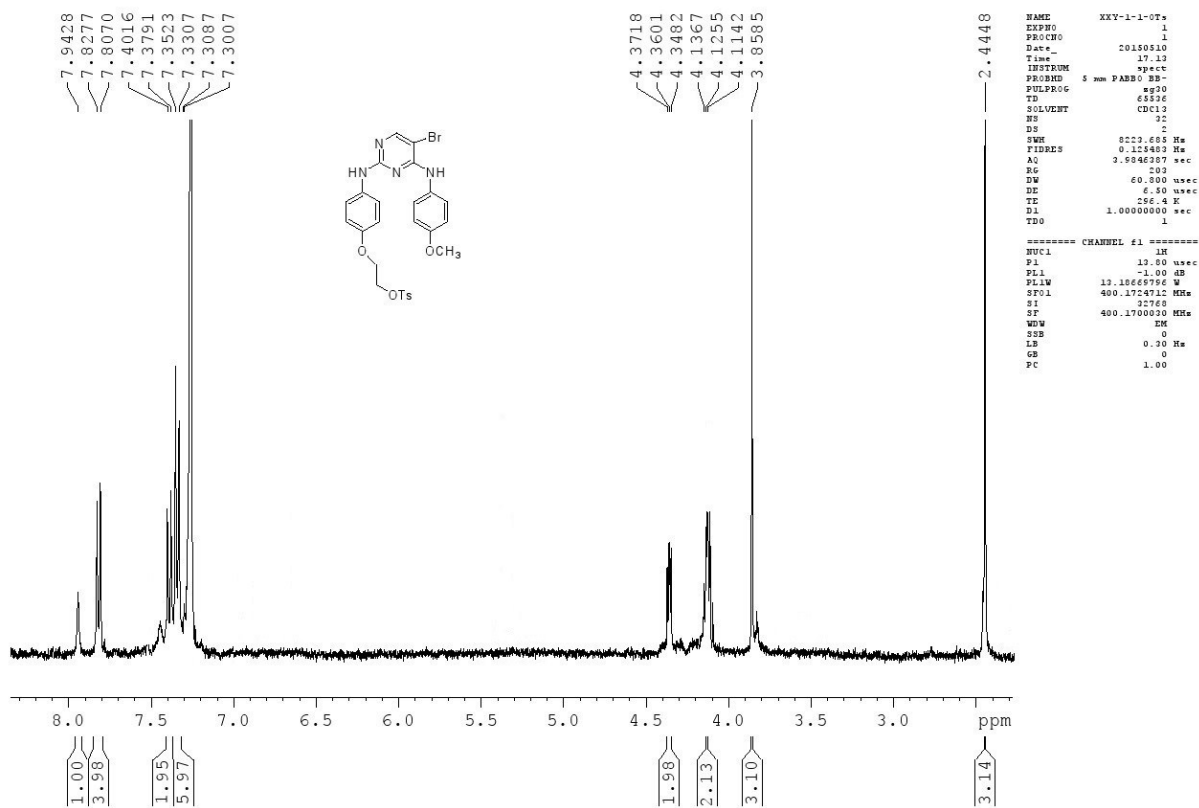

# <sup>13</sup>C NMR of 7:

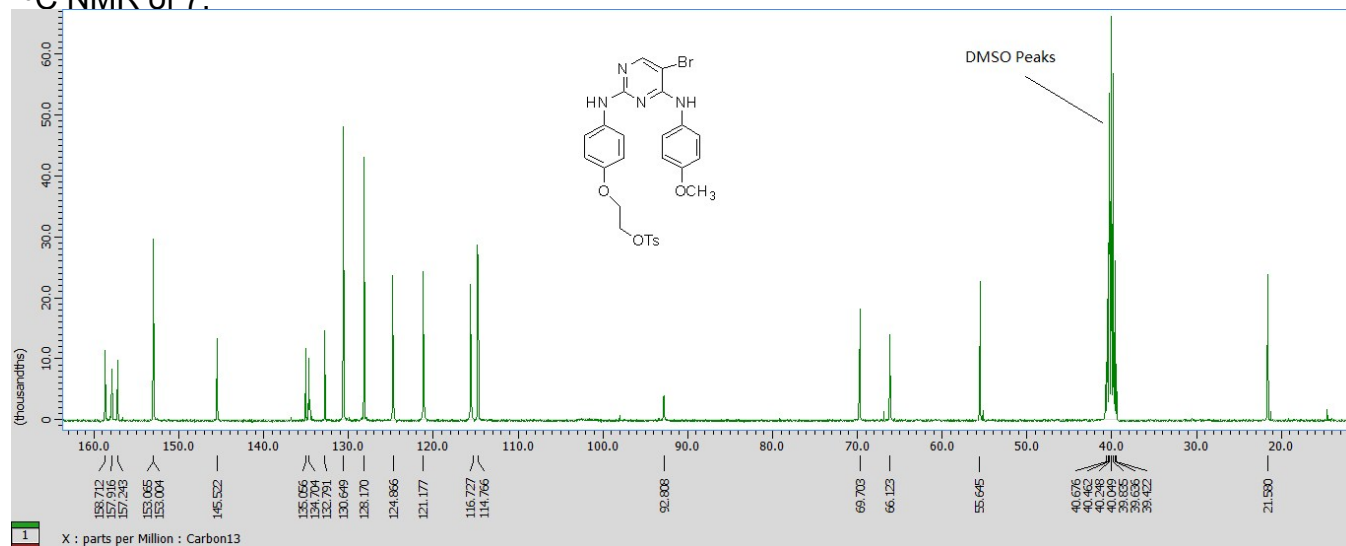

# HRMS (ESI) of 7:

Acq. File: 20170317.wiff

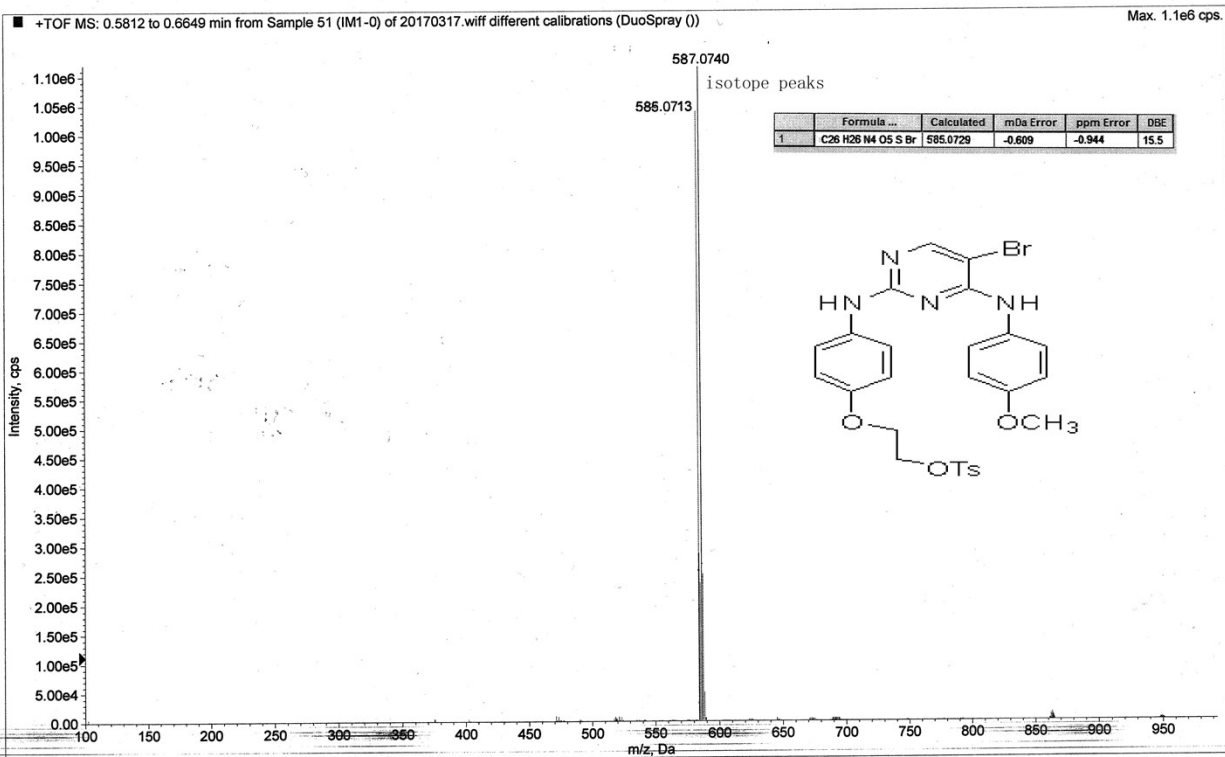

# <sup>1</sup>H NMR of 18a:

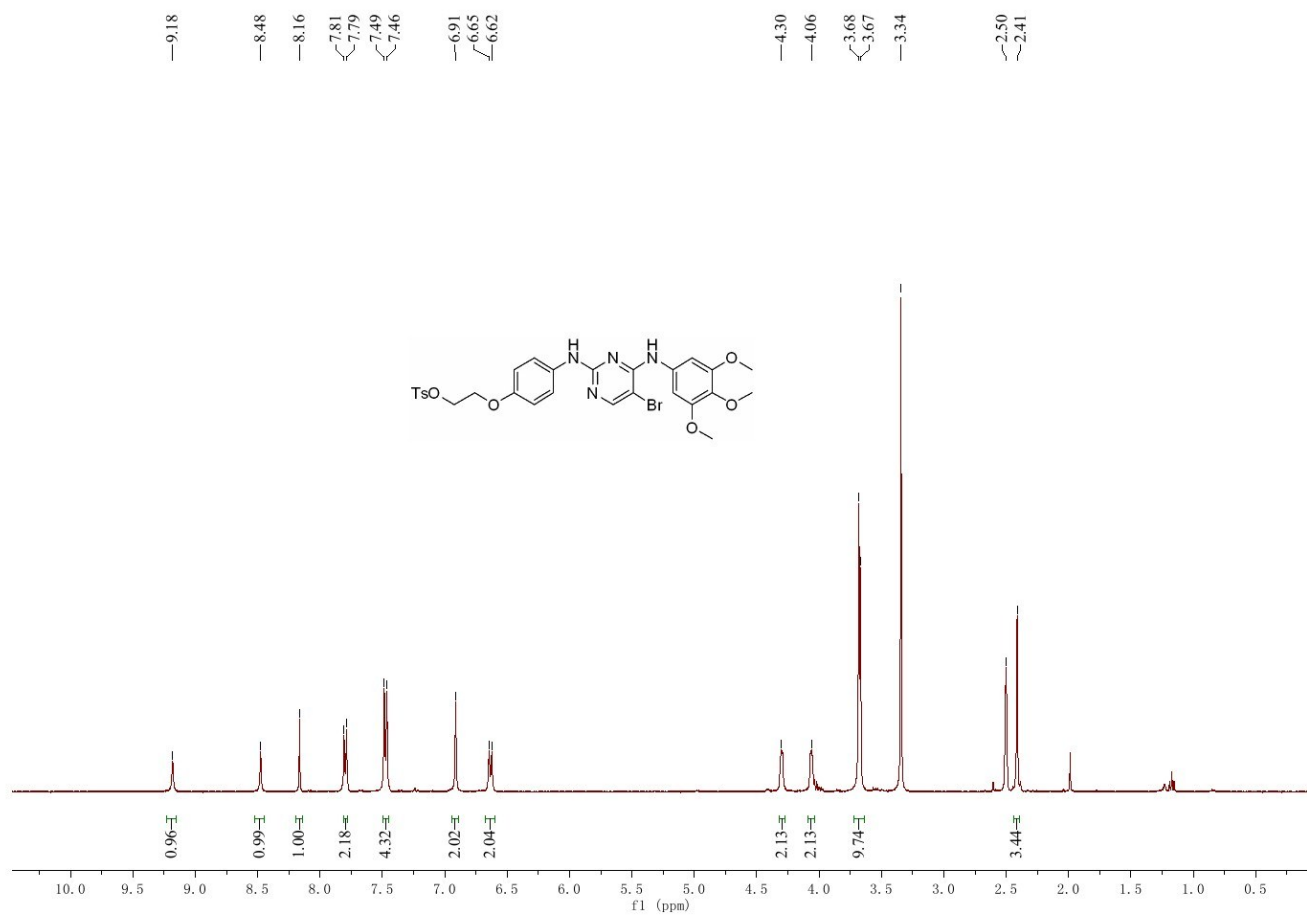

—9.18

—8.48

—8.16

~7.81

~7.79

~7.49

~7.46

—6.91

~6.65

~6.62

—4.30

—4.06

~3.68

~3.67

—3.34

~2.50

~2.41

0.96

0.99

1.00

2.18

4.32

2.02

2.04

2.13

2.13

9.74

3.44

10.0 9.5 9.0 8.5 8.0 7.5 7.0 6.5 6.0 5.5 5.0 4.5 4.0 3.5 3.0 2.5 2.0 1.5 1.0 0.5

f1 (ppm)

# <sup>13</sup>C NMR of 18a:

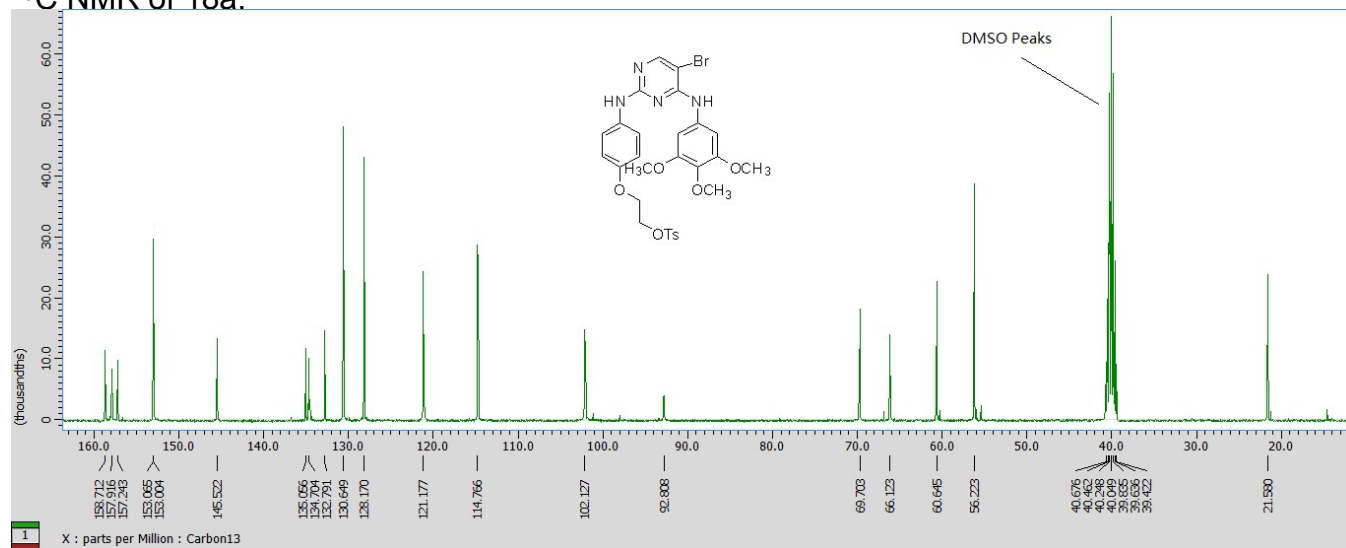

# HRMS (ESI) of 18a:

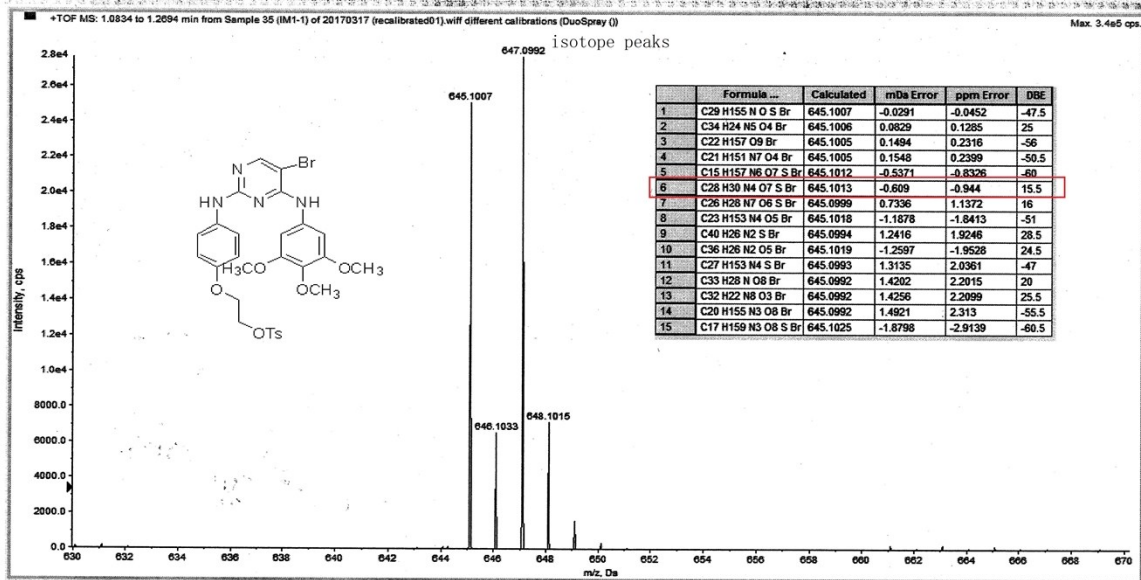

<sup>1</sup>H NMR of 18b:

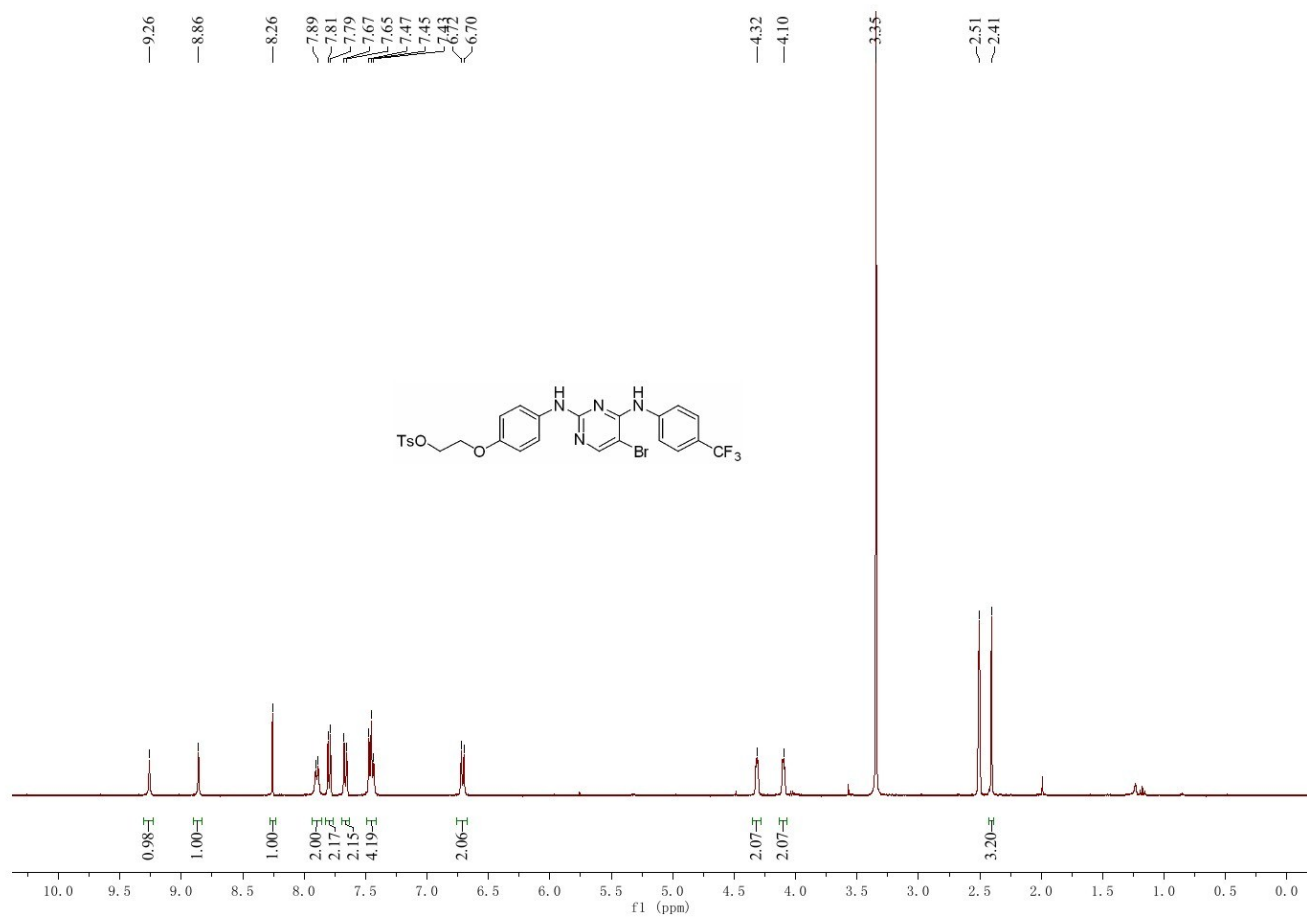



# <sup>13</sup>C NMR of 18b:

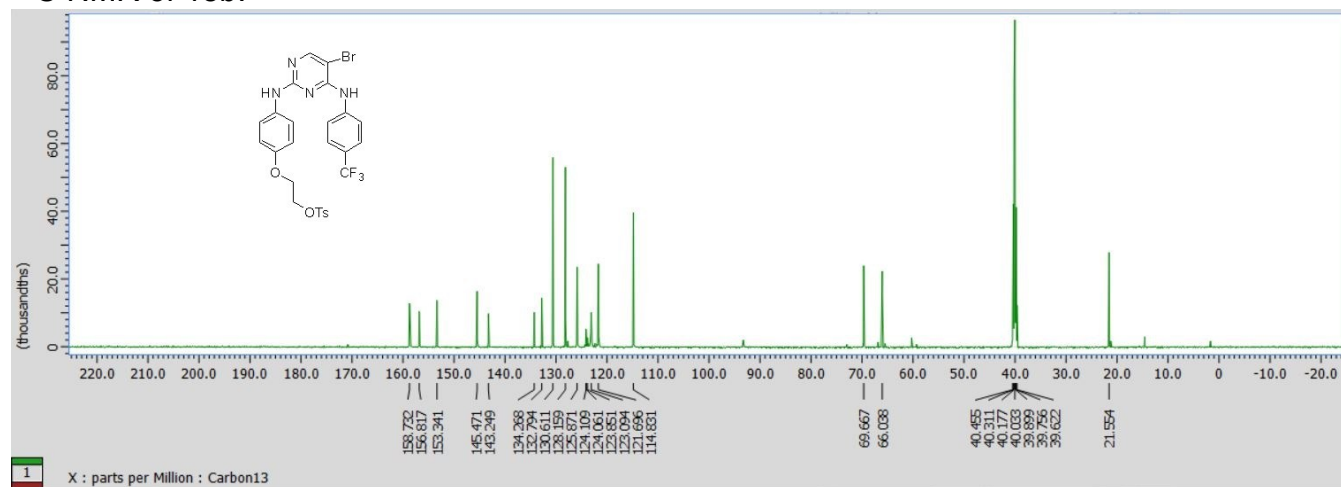

HRMS (ESI) of 18b:

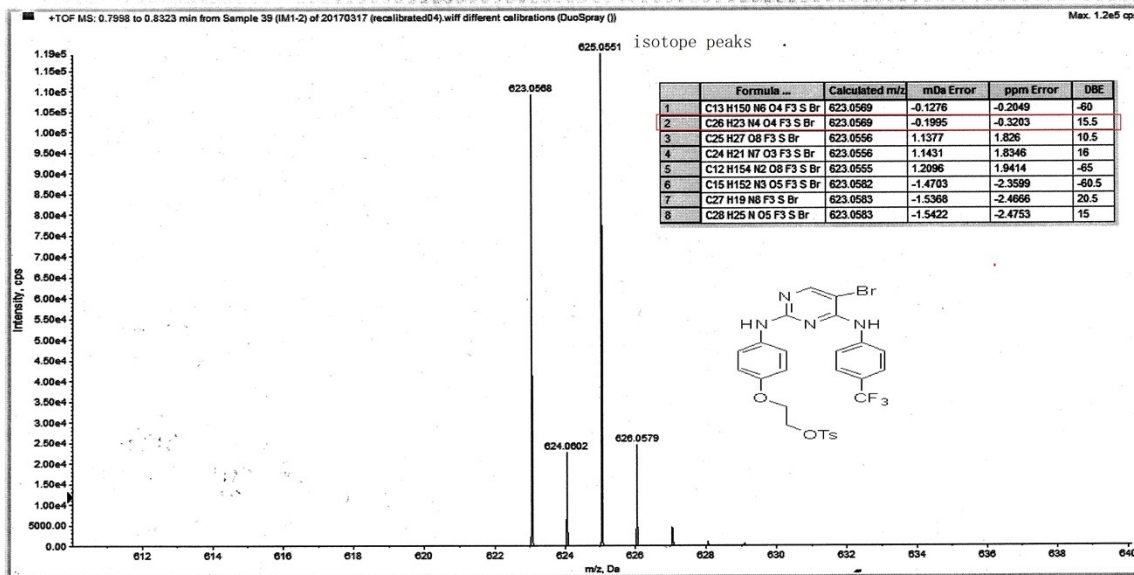

<sup>1</sup>H NMR of 18c:

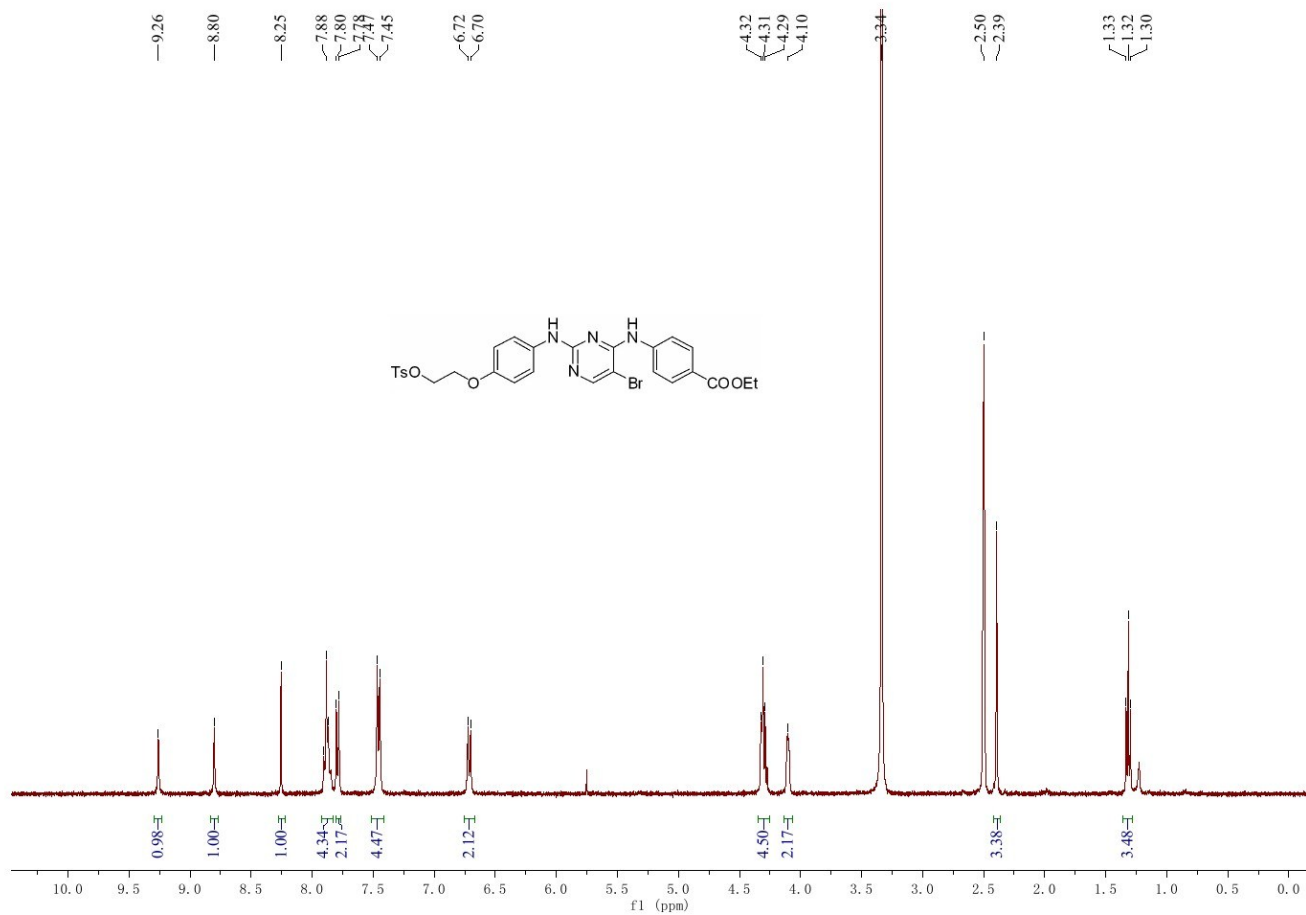

# <sup>13</sup>C NMR of 18c:

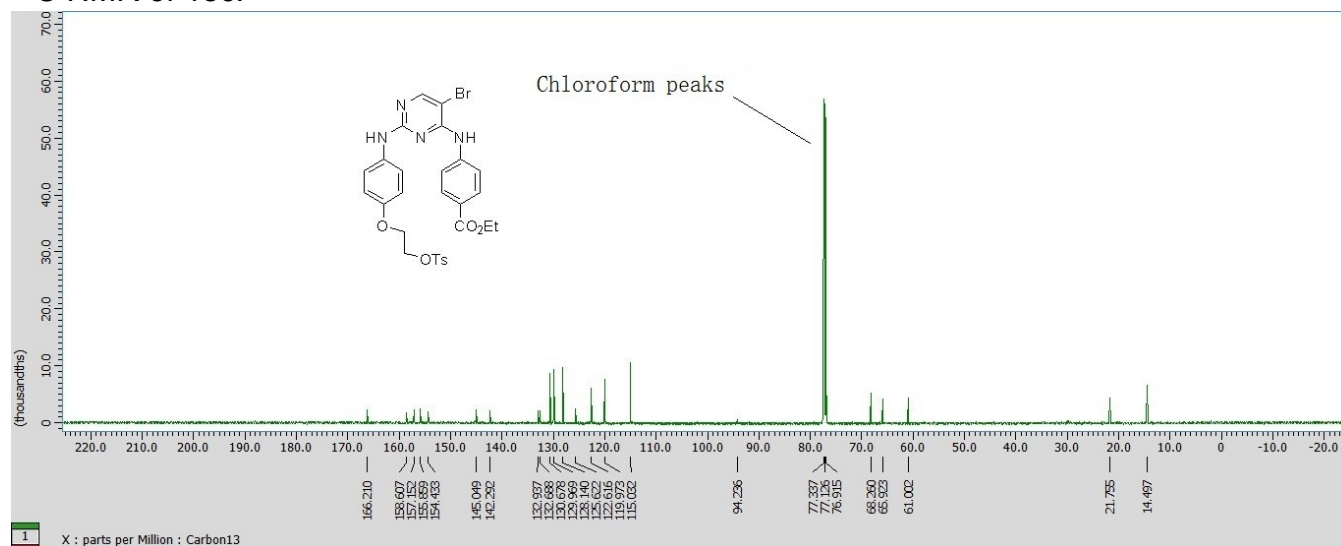

# HRMS (ESI) of 18c:

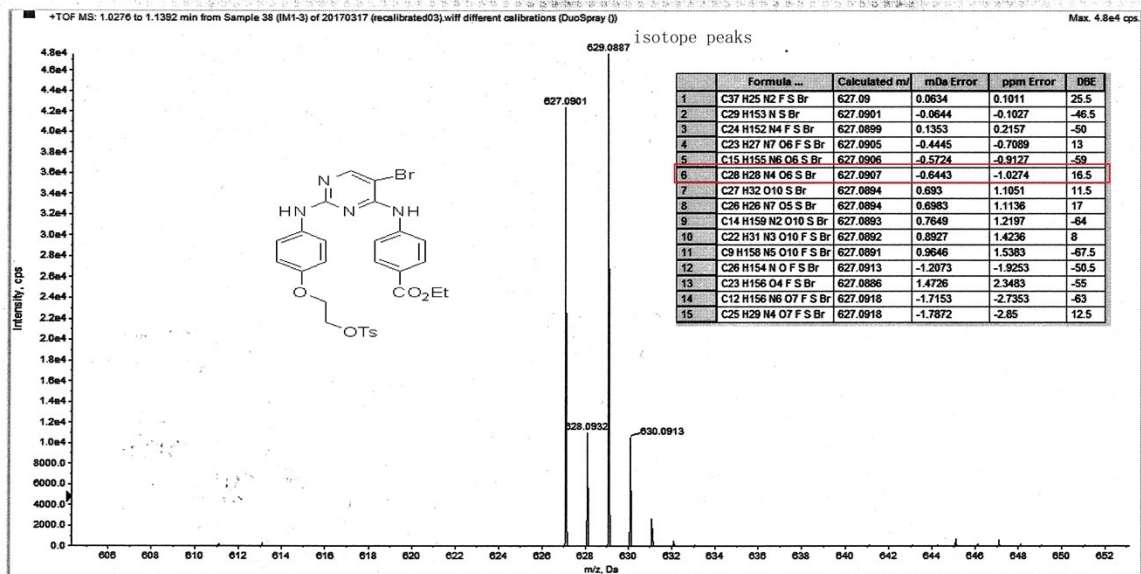

<sup>1</sup>H NMR of 18d:

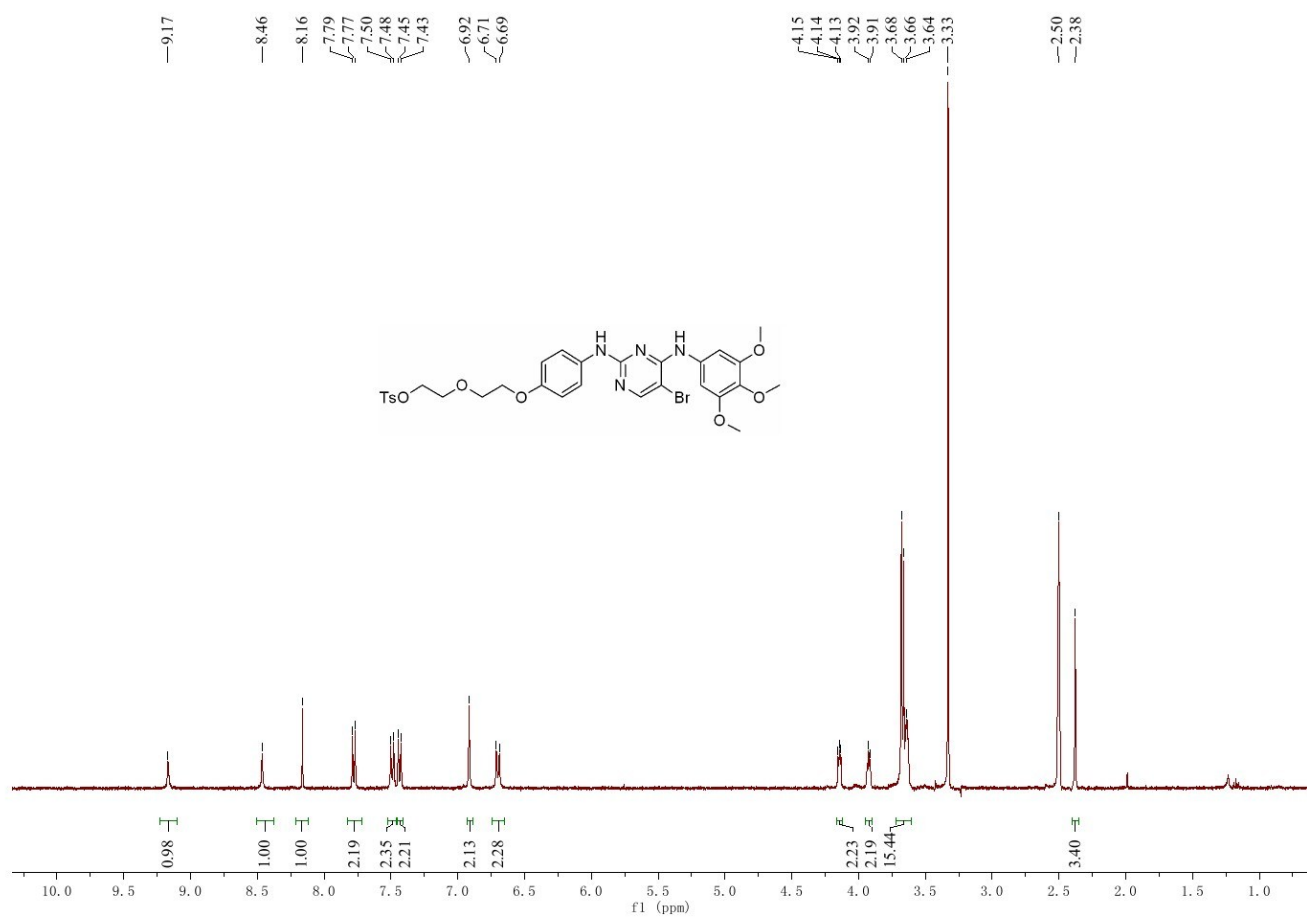



# HRMS (ESI) of 18d:

Acq. File: 20170317.wiff

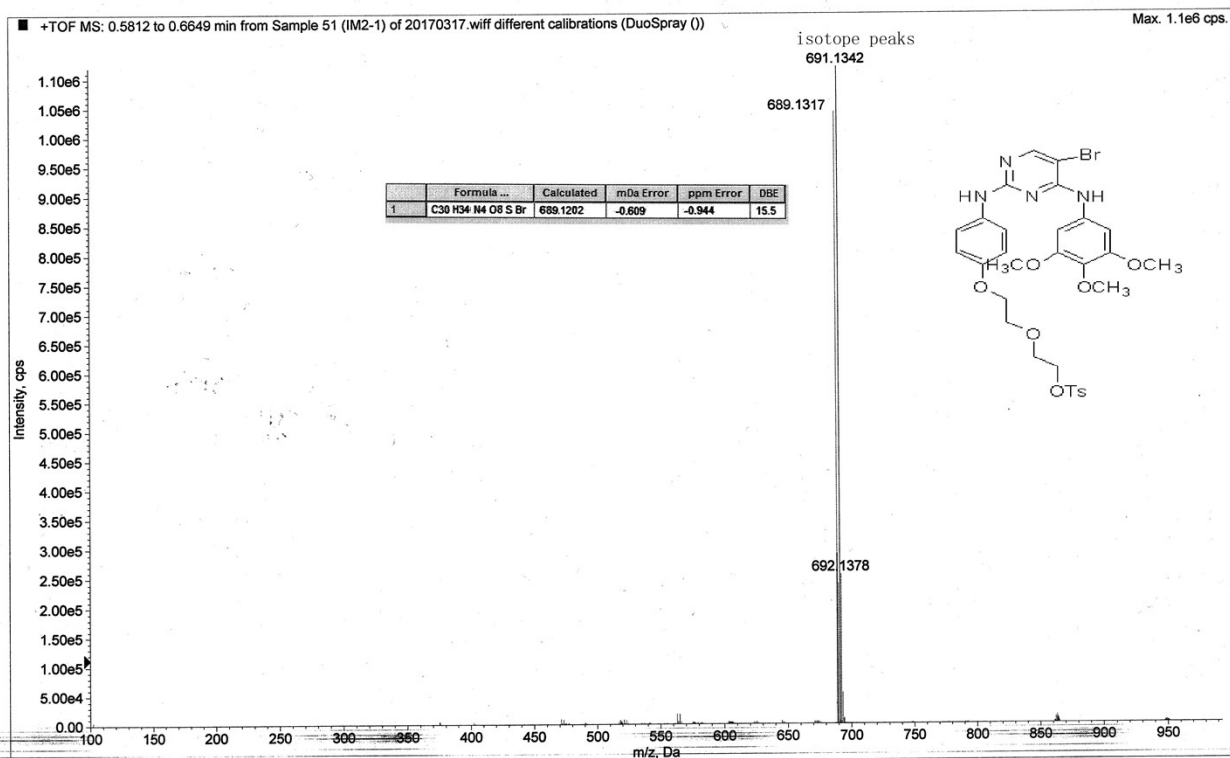



<sup>1</sup>H NMR of 18e:

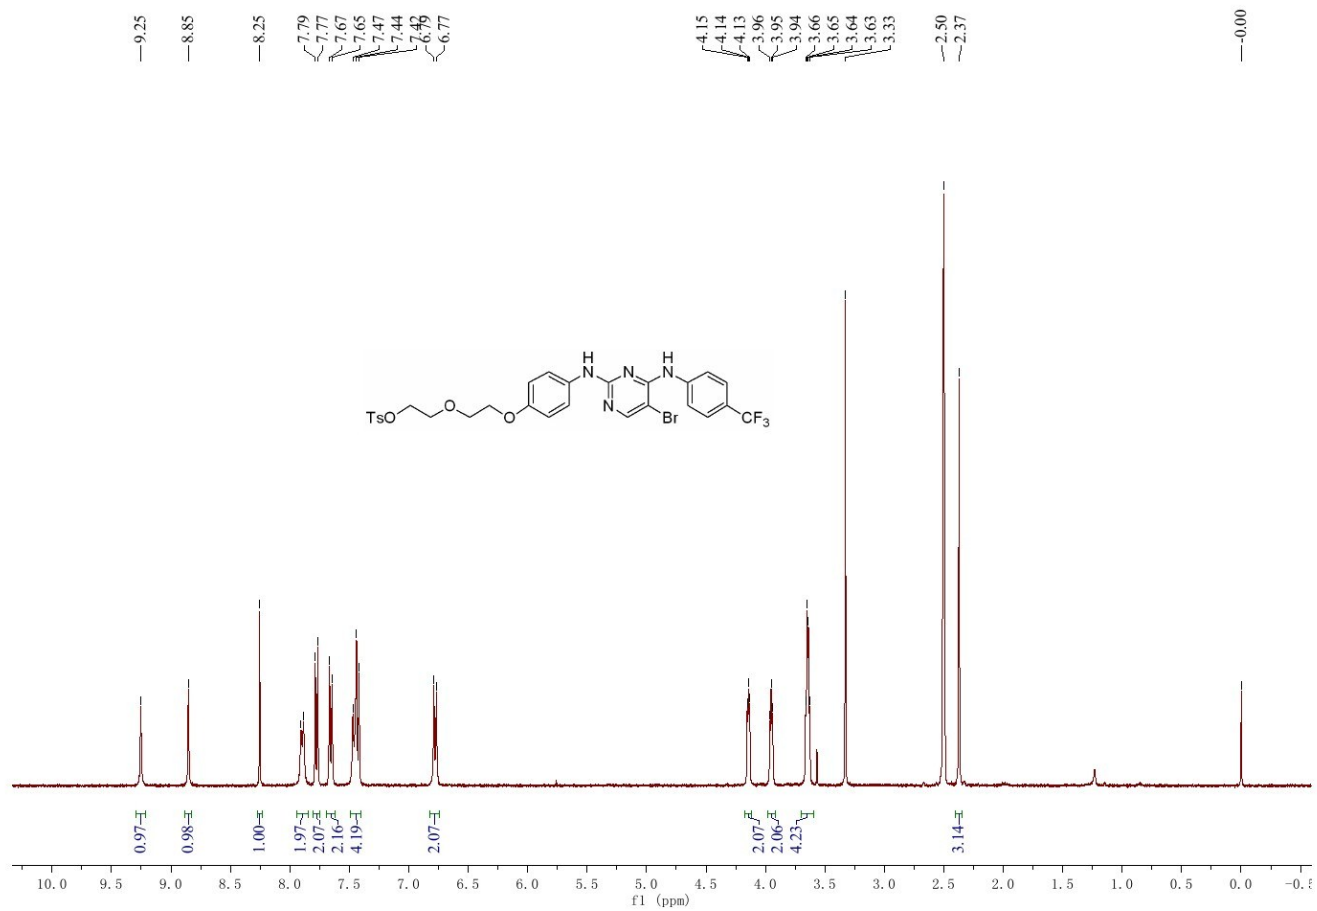

# <sup>13</sup>C NMR of 18e:

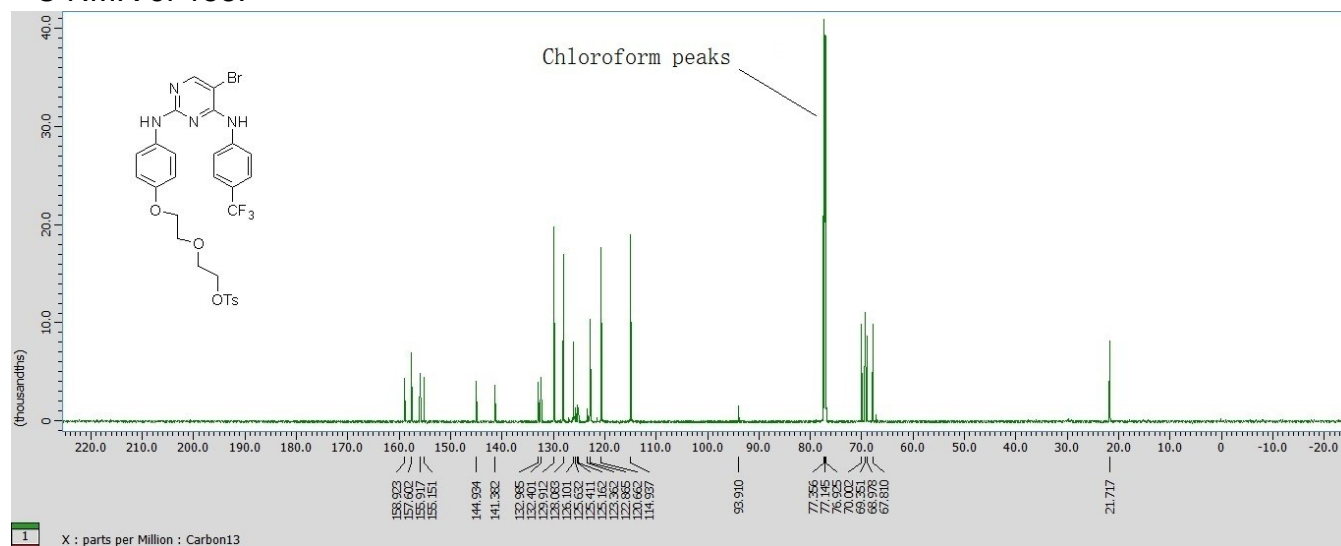

# HRMS (ESI) of 18e:

Acq. File: 20170317.wiff

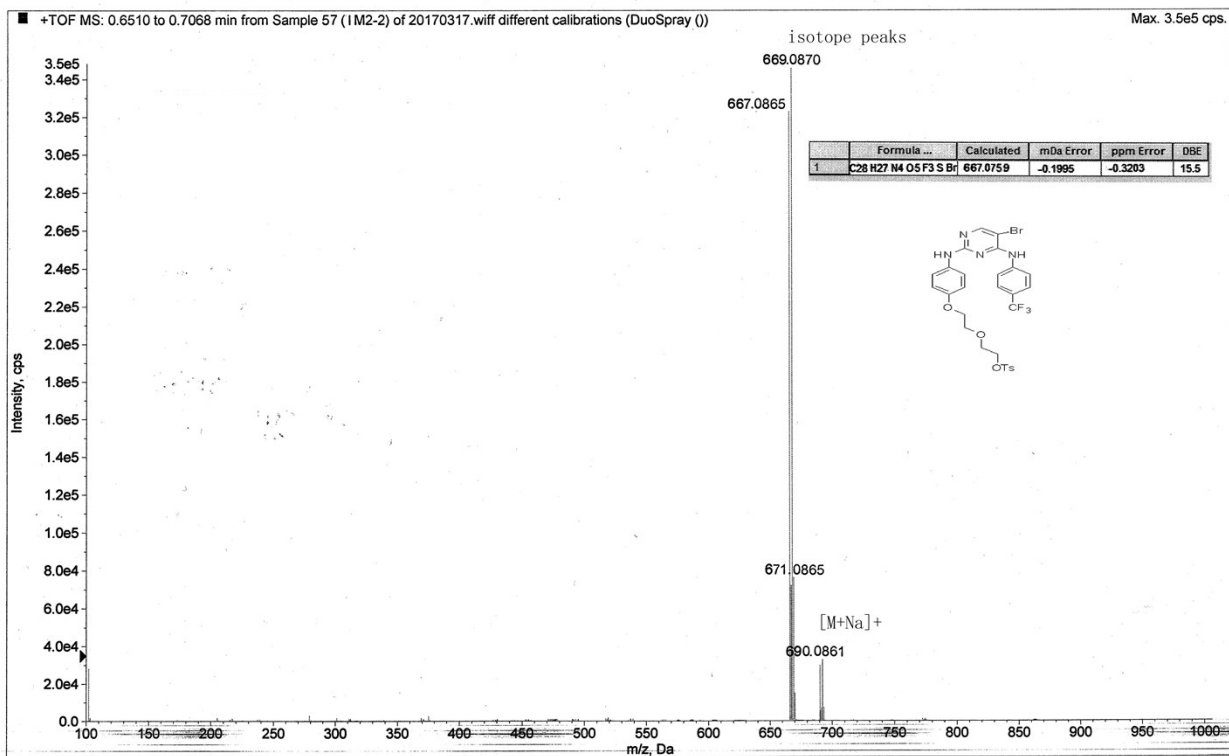

<sup>1</sup>H NMR of 18f:

—9.27  
—8.81  
—8.26  
7.88  
7.79  
7.77  
7.62  
7.47  
7.43  
7.41  
7.15  
6.81  
6.79

4.32  
4.30  
4.28  
4.27  
4.16  
4.15  
4.14  
3.97  
3.96  
3.95  
3.67  
3.66  
3.65  
3.64

—2.50  
—2.36  
—1.99

1.33  
1.31  
1.30

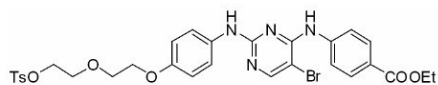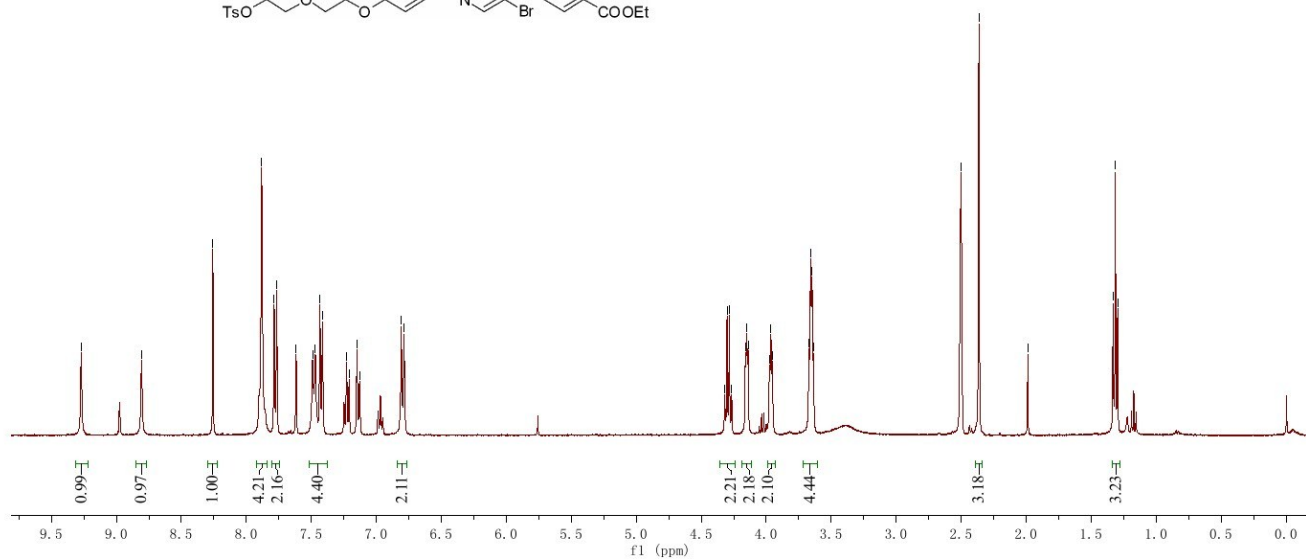

# <sup>13</sup>C NMR of 18f:

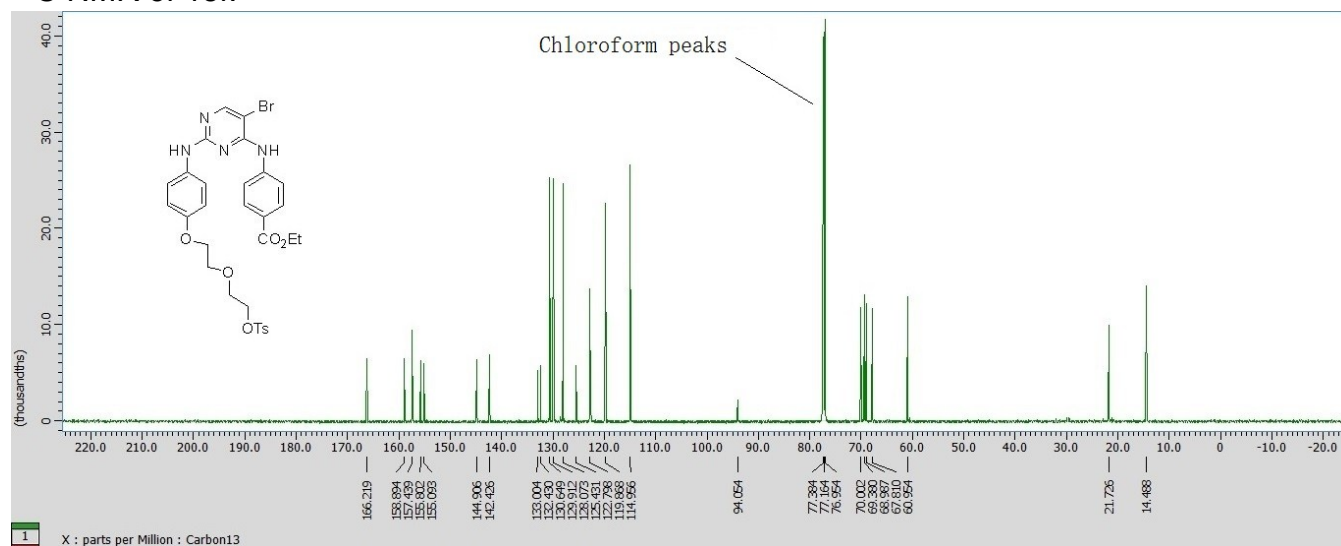

# HRMS (ESI) of 18f:

Acq. File: 20170317.wiff

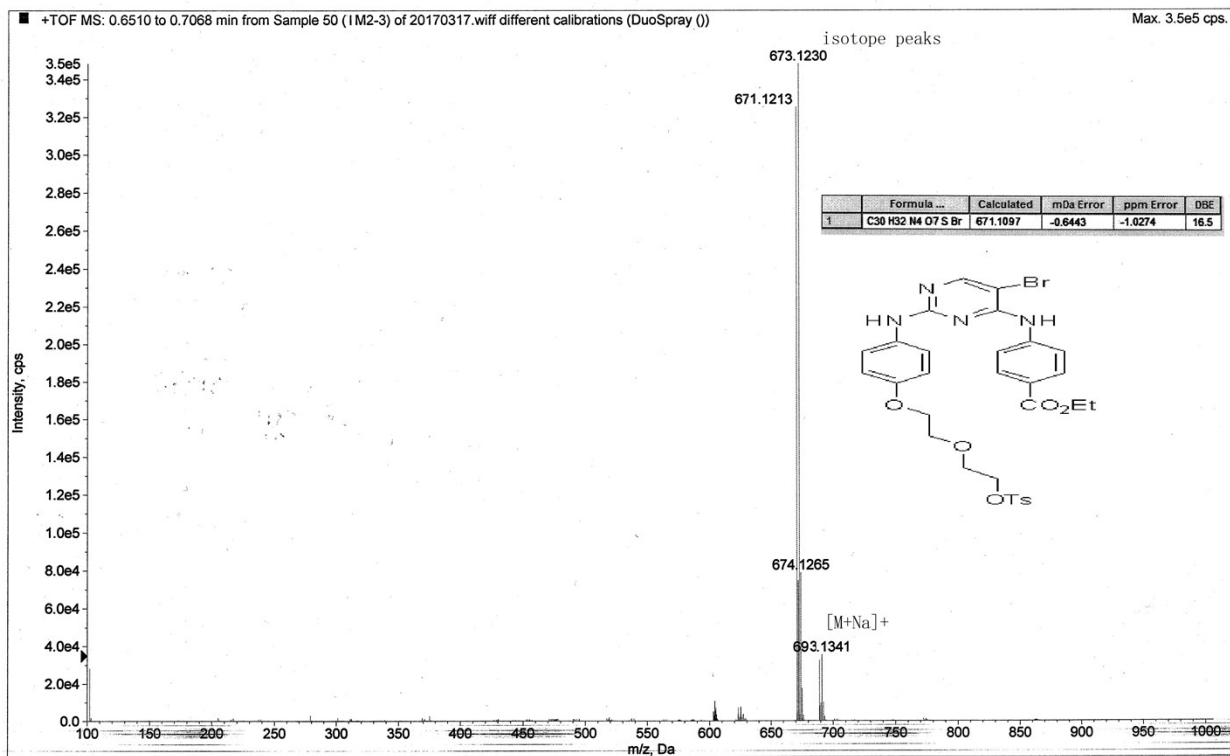

<sup>1</sup>H NMR of 8a:

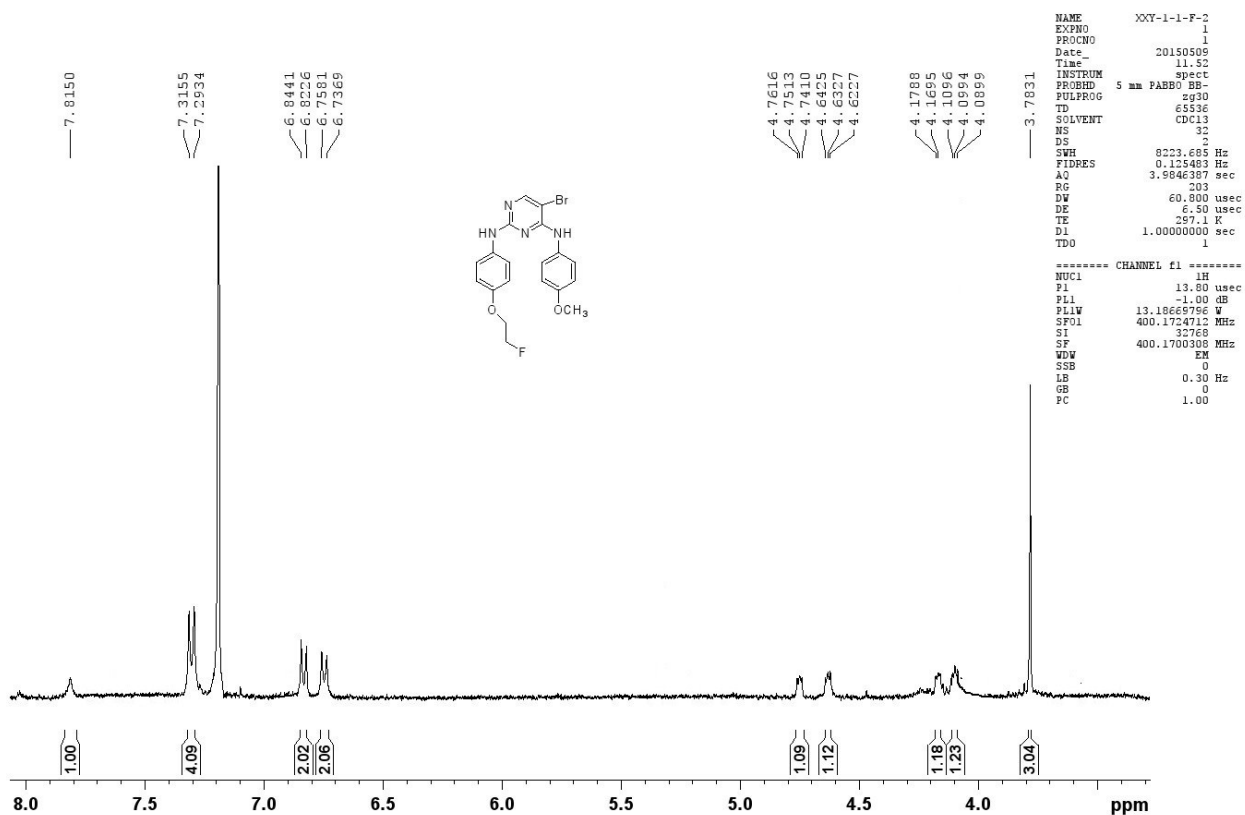

# <sup>13</sup>C NMR of 8a:

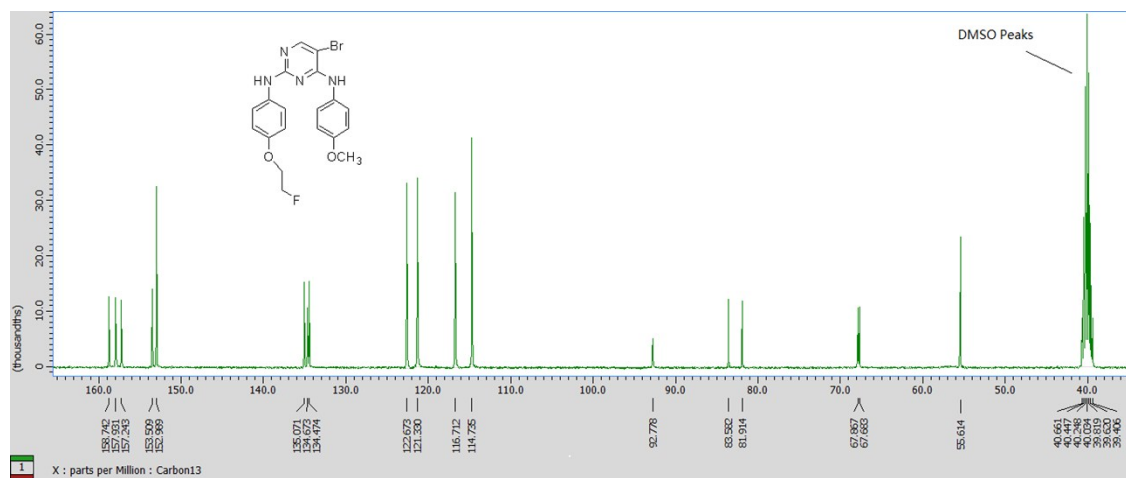



# HRMS (ESI) of 8a:

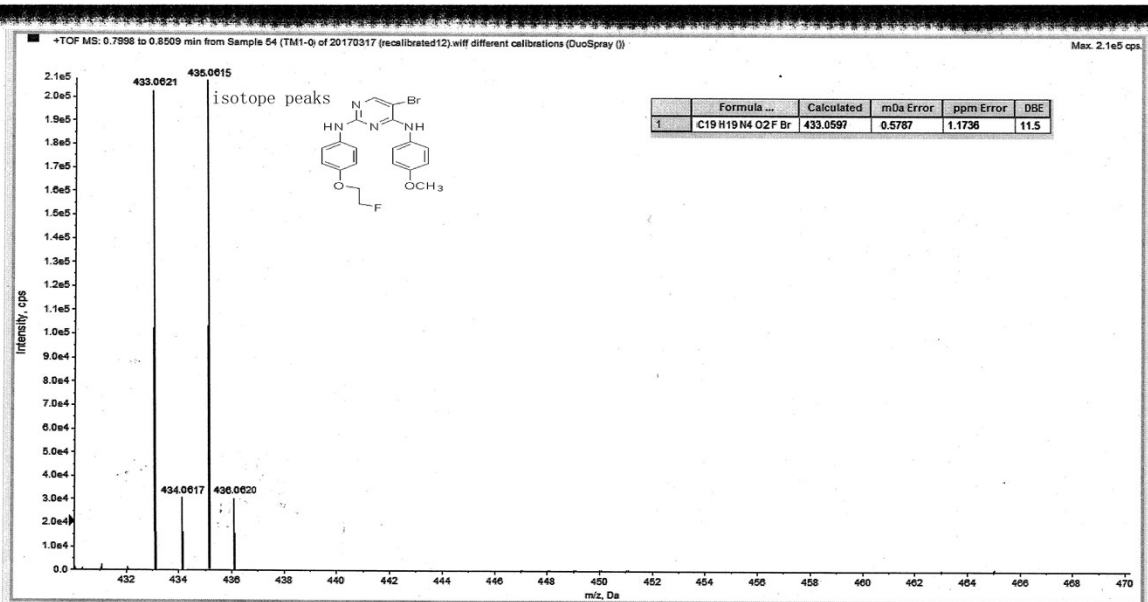

# <sup>1</sup>H NMR of 8b:

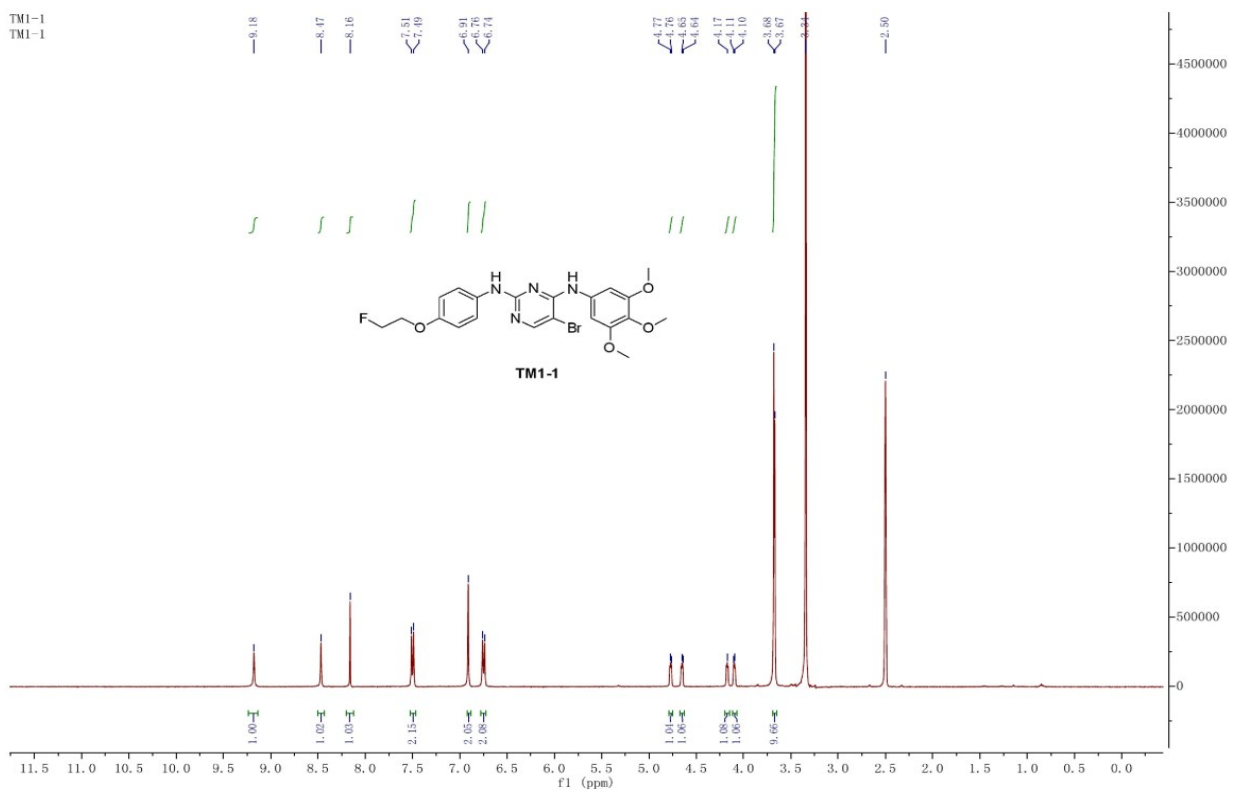

# <sup>13</sup>C NMR of 8b:

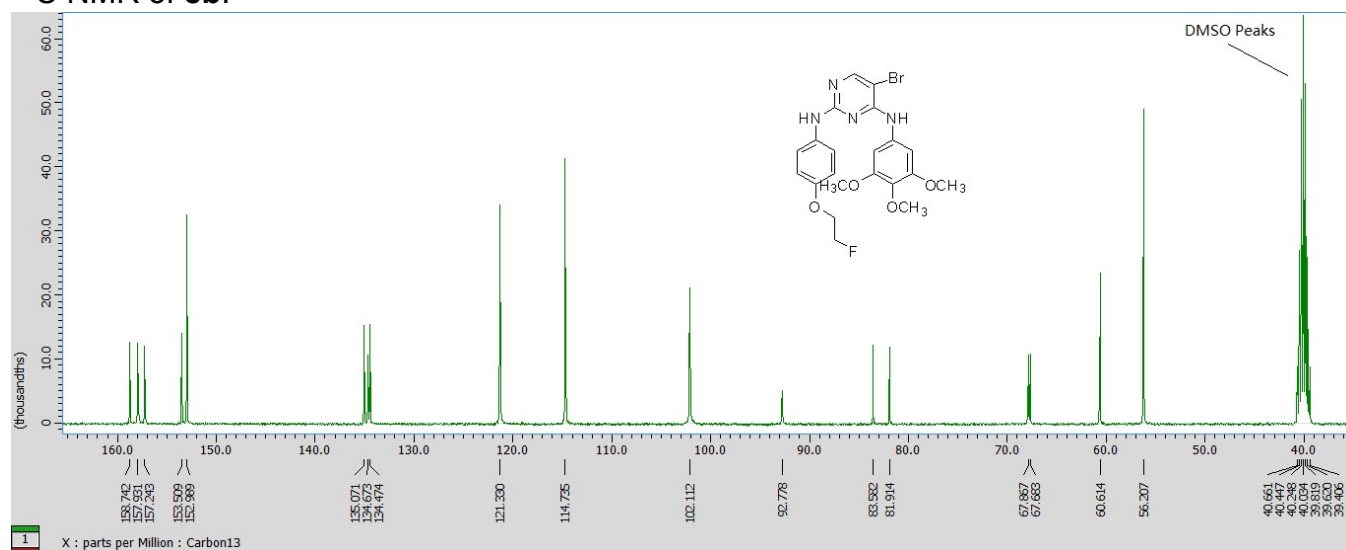

# HRMS (ESI) of 8b:

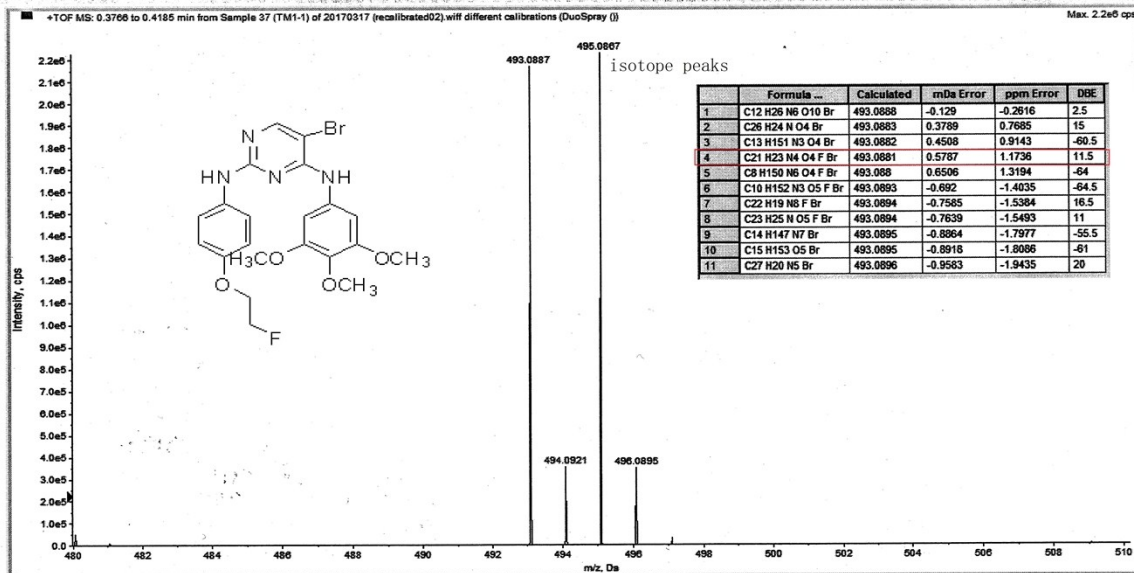

# <sup>1</sup>H NMR of 8c:

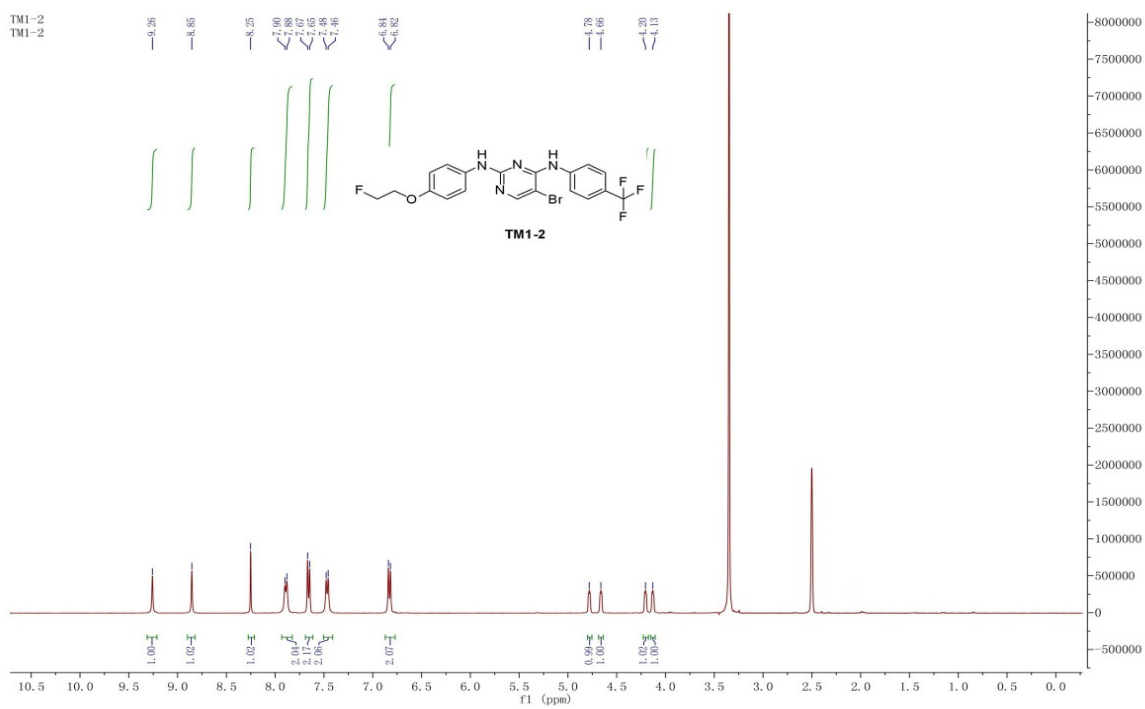

# <sup>13</sup>C NMR of 8c:

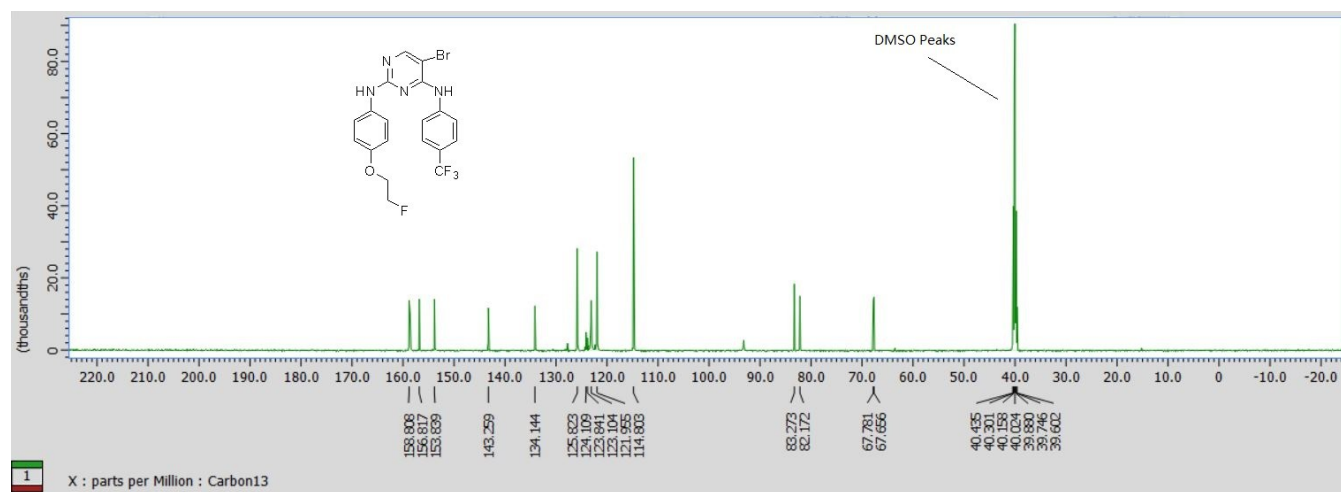

# HRMS (ESI) of 8c:

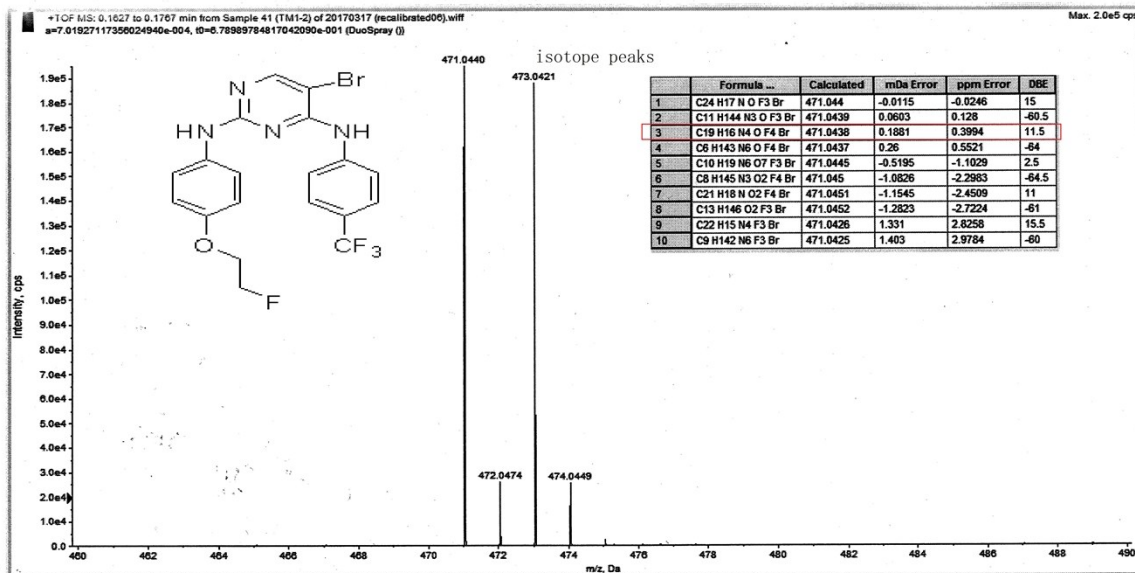

# <sup>1</sup>H NMR of 8d:

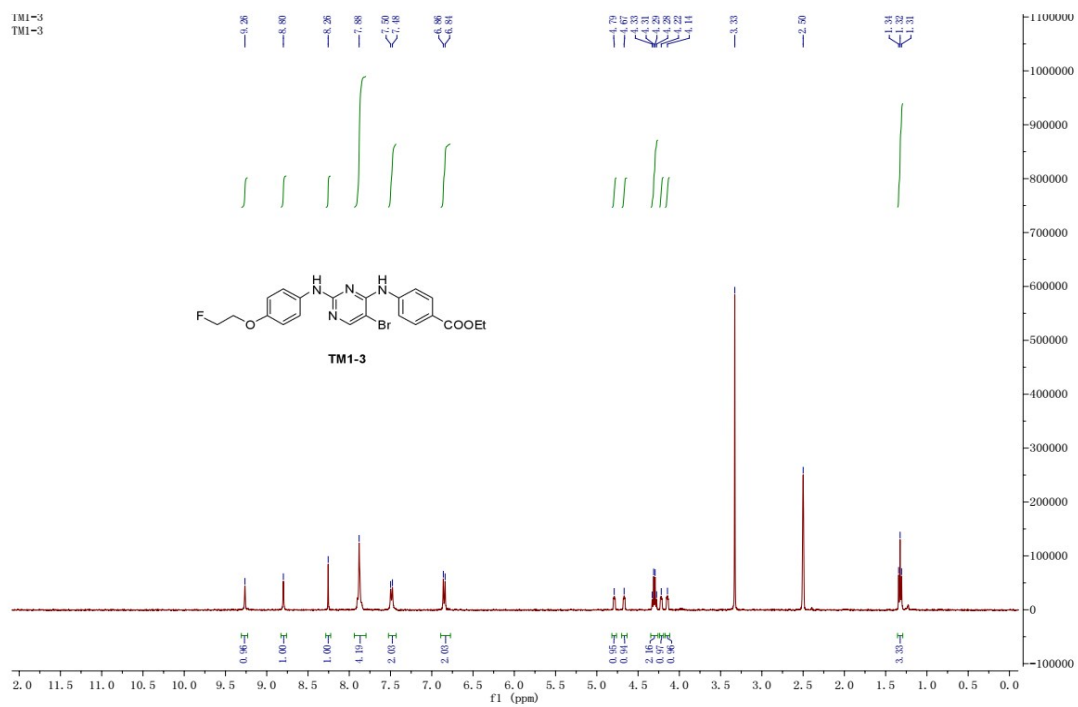



# <sup>13</sup>C NMR of 8d:

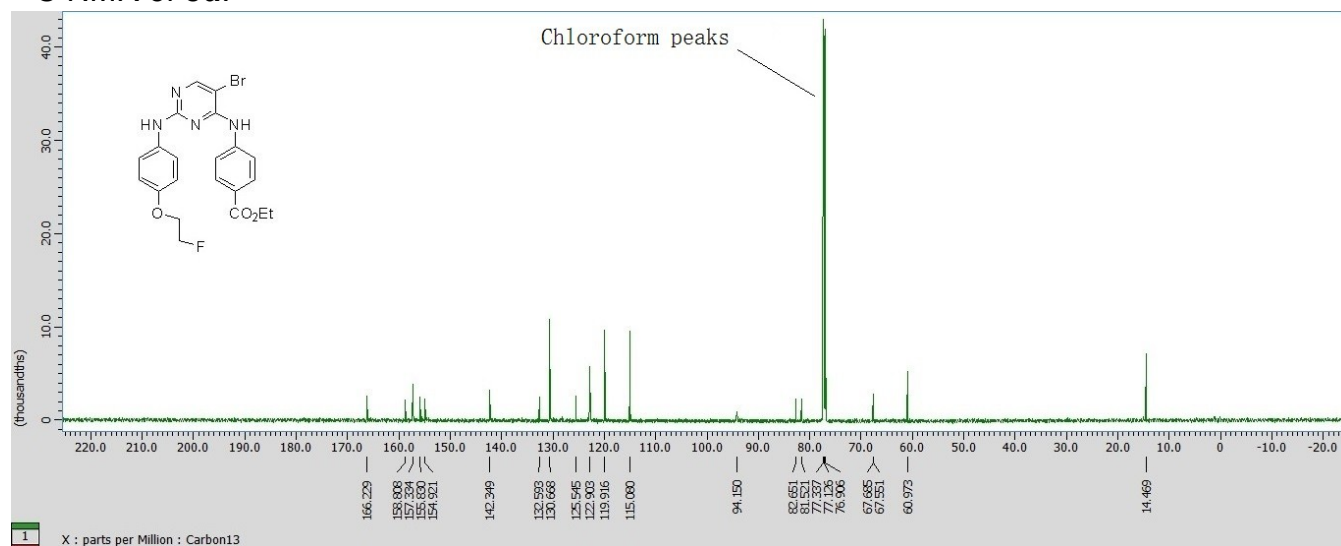

# HRMS (ESI) of 8d:

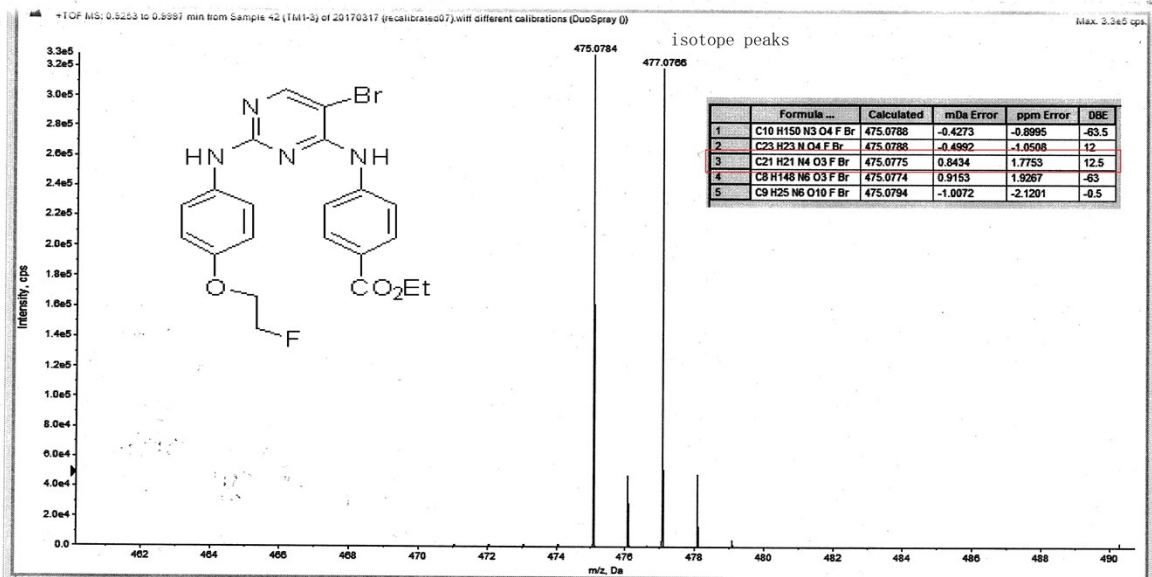

# <sup>1</sup>H NMR of 8e:

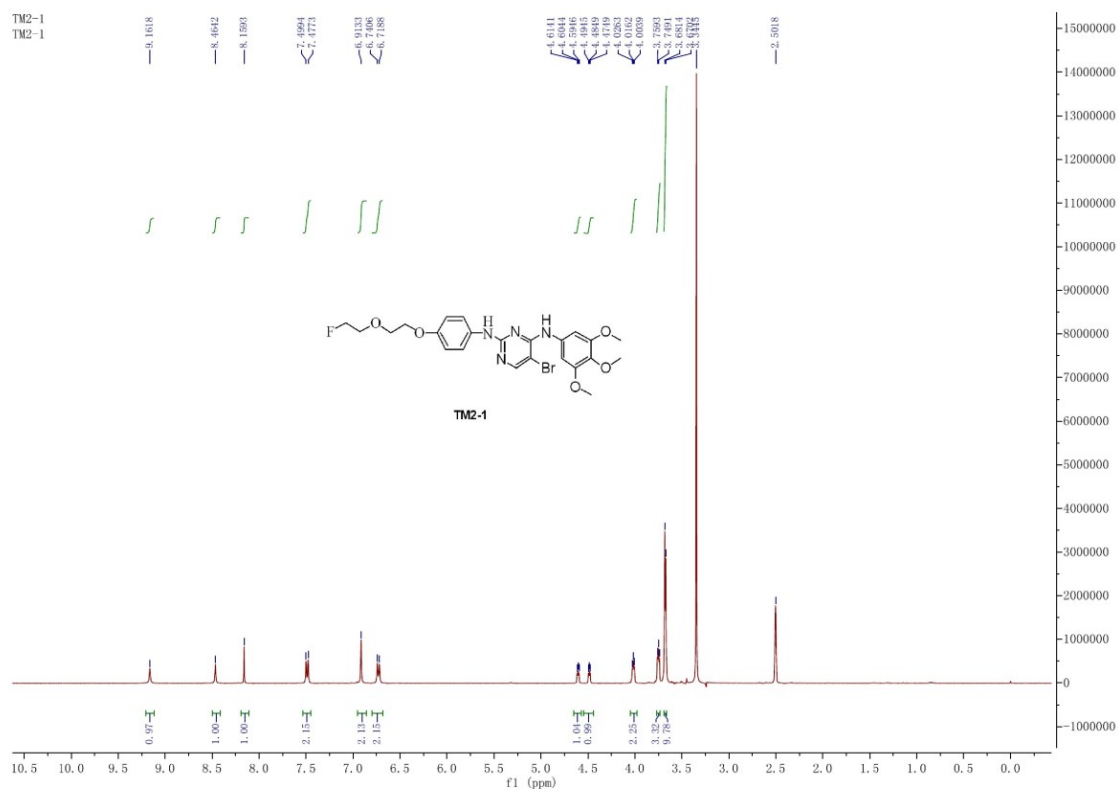

# <sup>13</sup>C NMR of 8e:

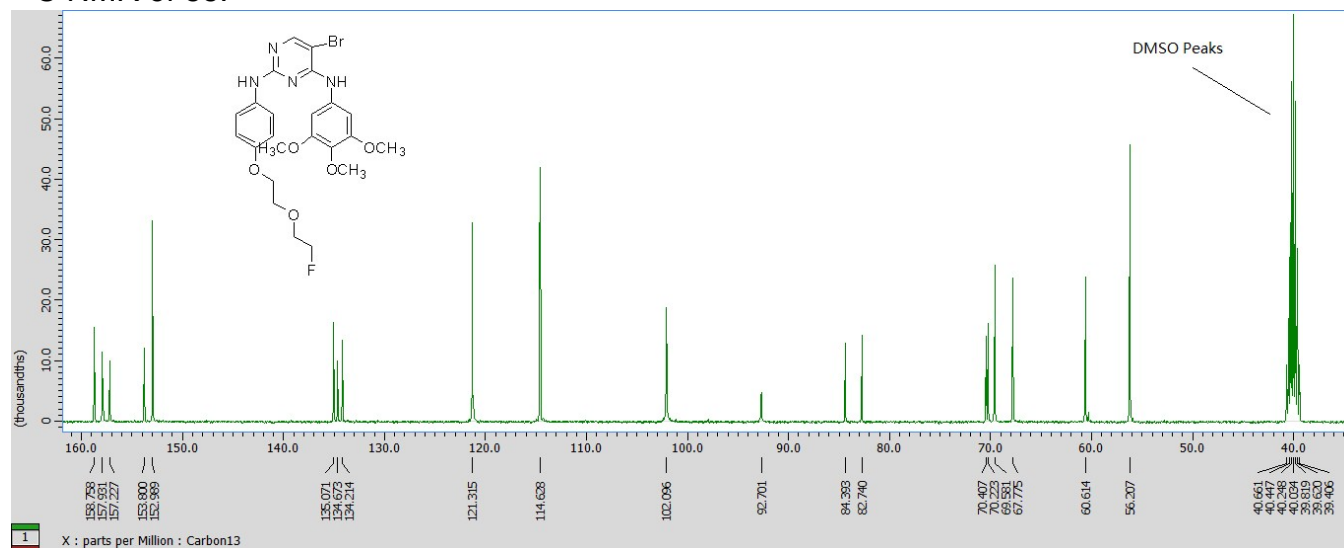

# HRMS (ESI) of 8e:

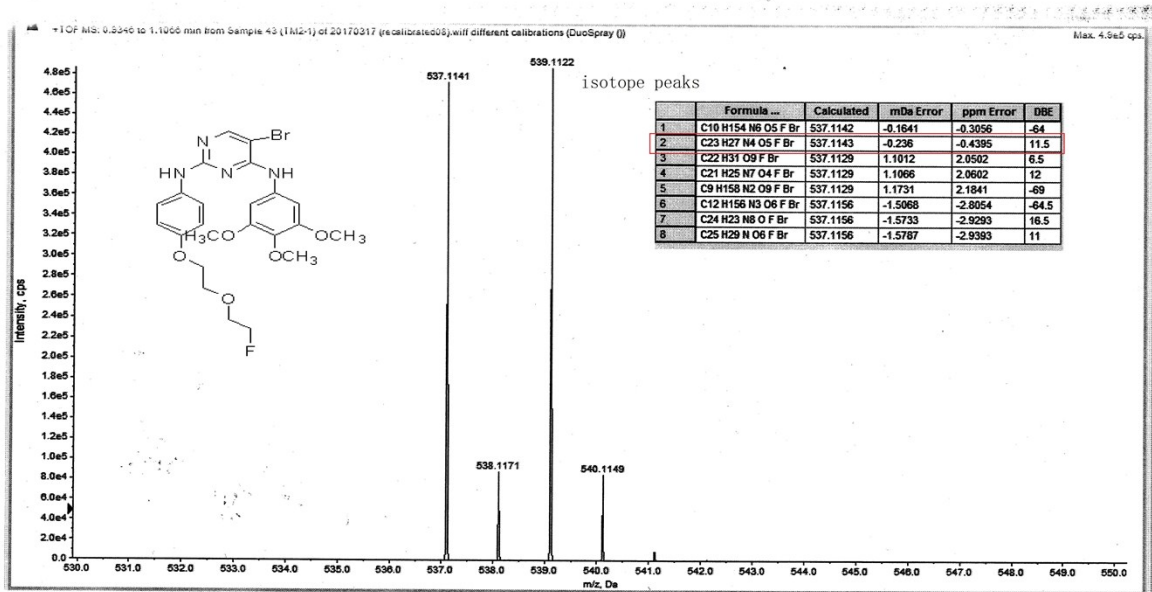



# <sup>13</sup>C NMR of 8f:

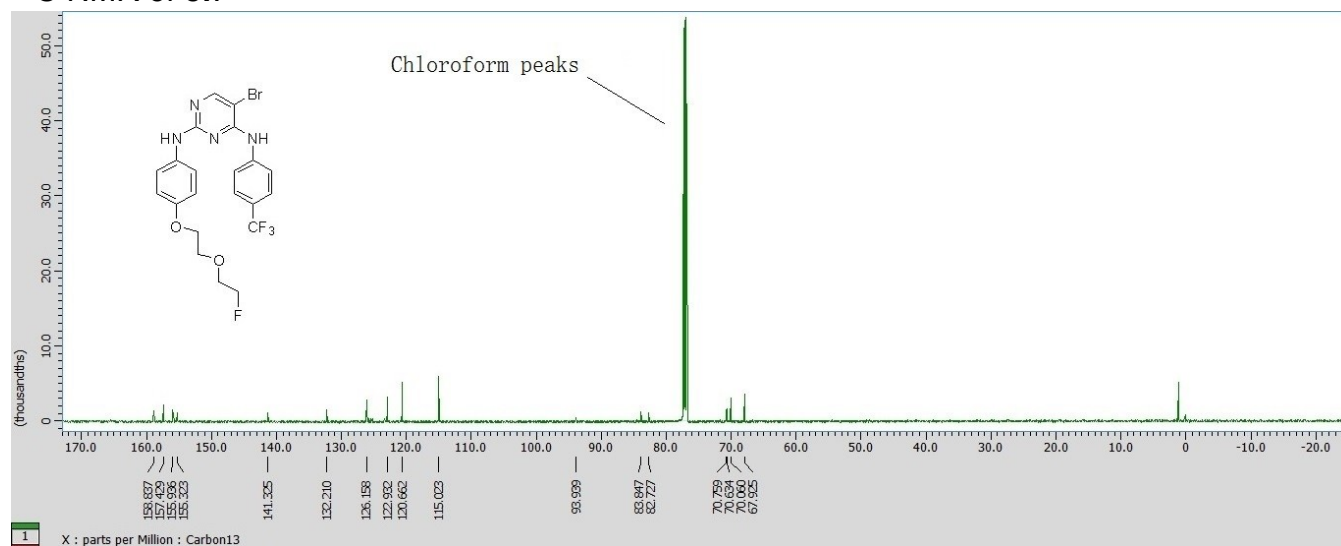

# HRMS (ESI) of 8f:

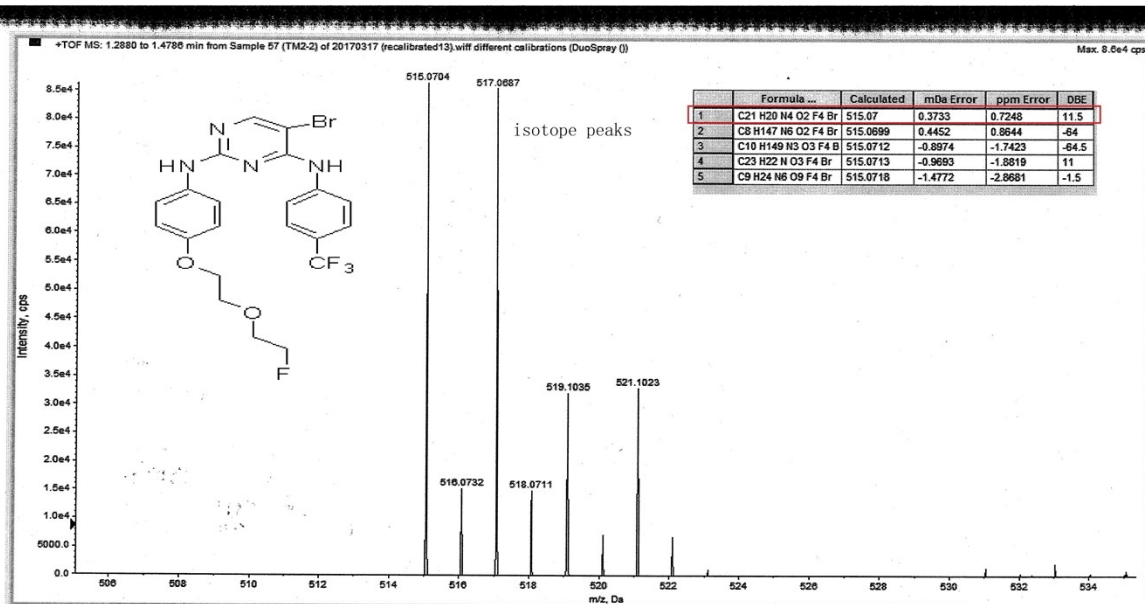



<sup>1</sup>H NMR of 8g:

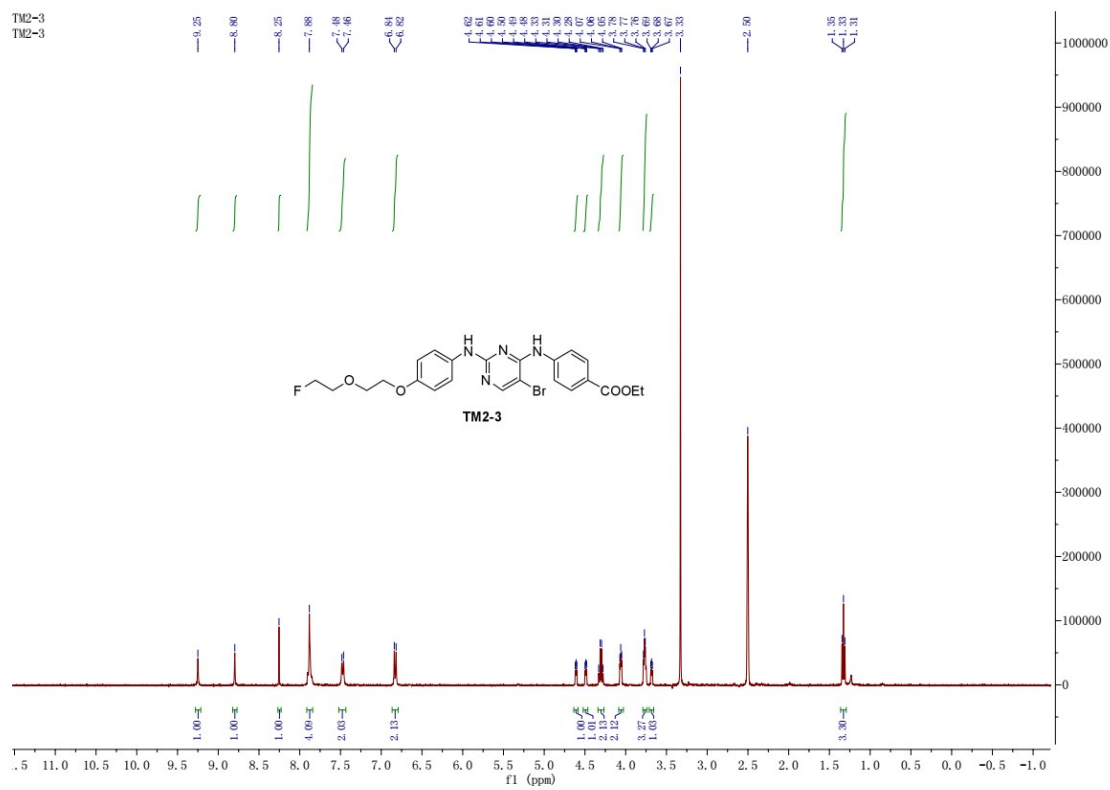

# <sup>13</sup>C NMR of 8g:

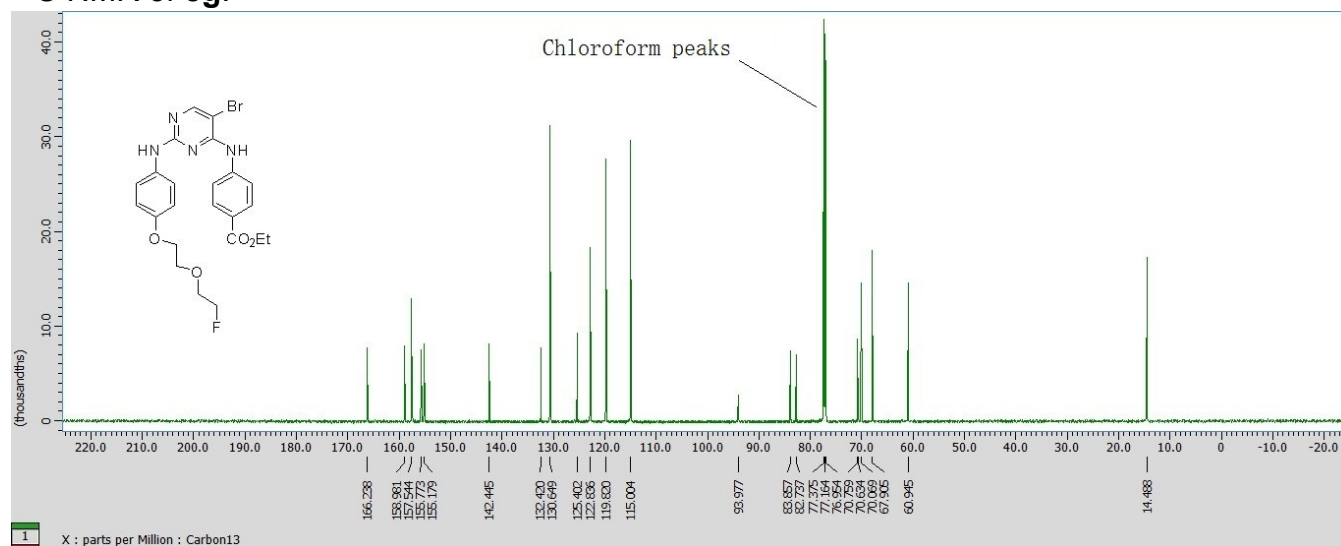

# HRMS (ESI) of 8g:

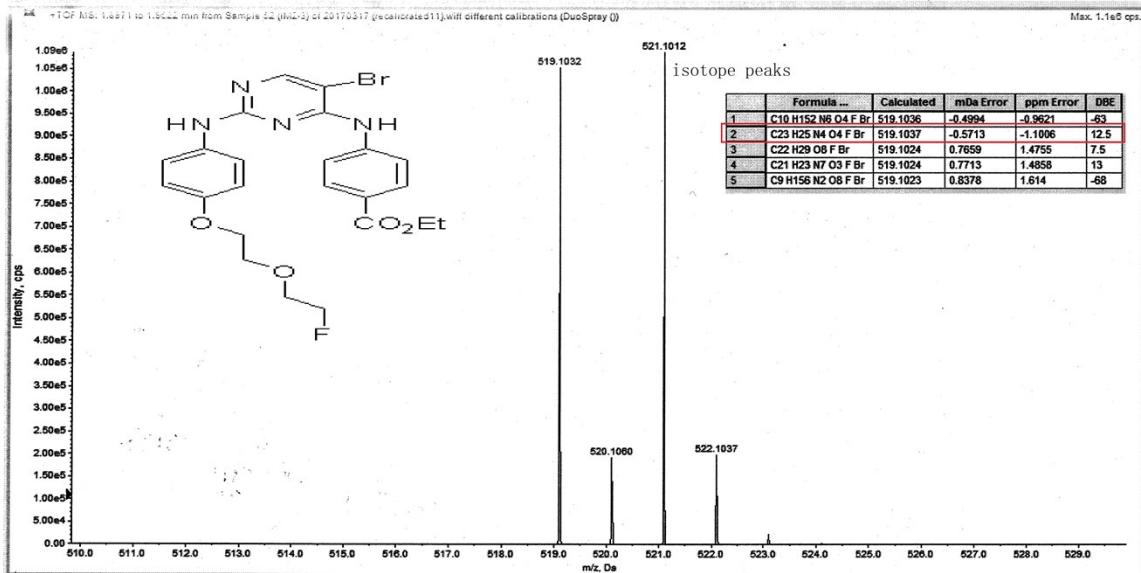

# <sup>1</sup>H NMR of 8h:

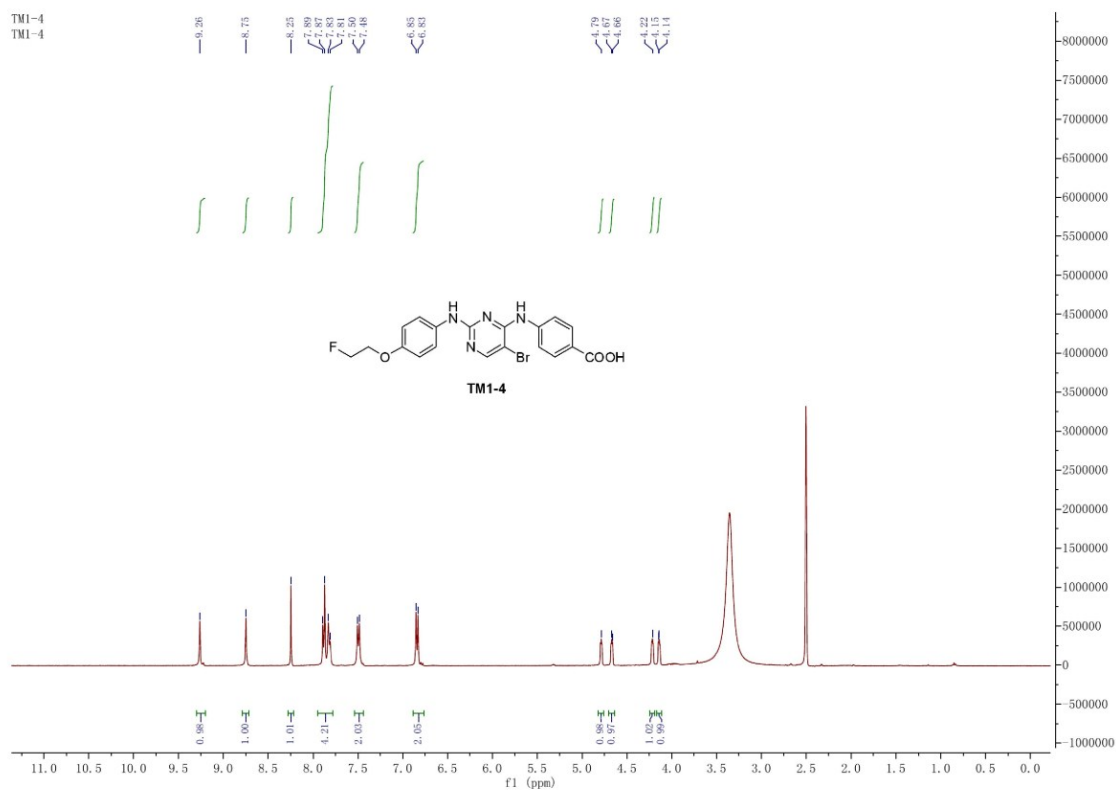

# <sup>13</sup>C NMR of 8h:

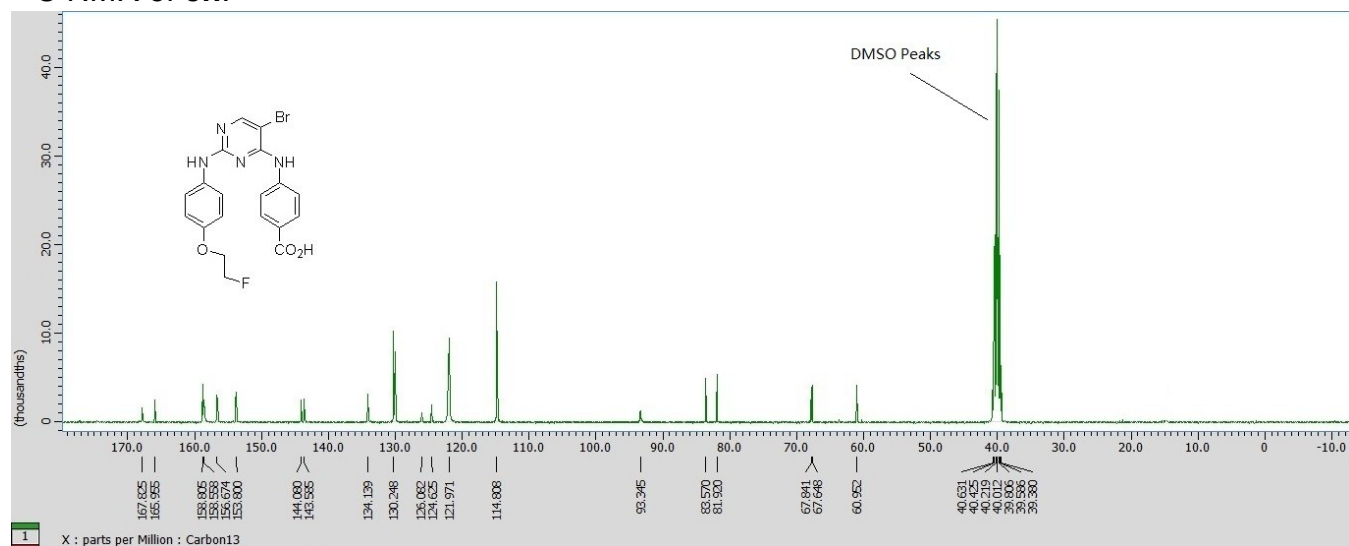

# HRMS (ESI) of 8h:

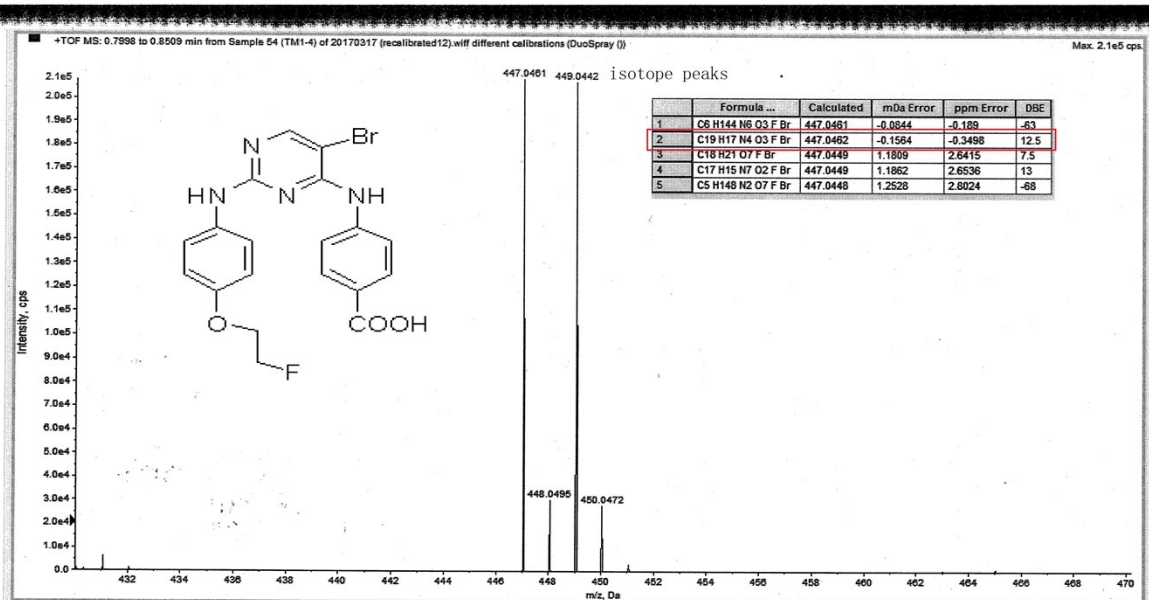

# <sup>1</sup>H NMR of 8i:

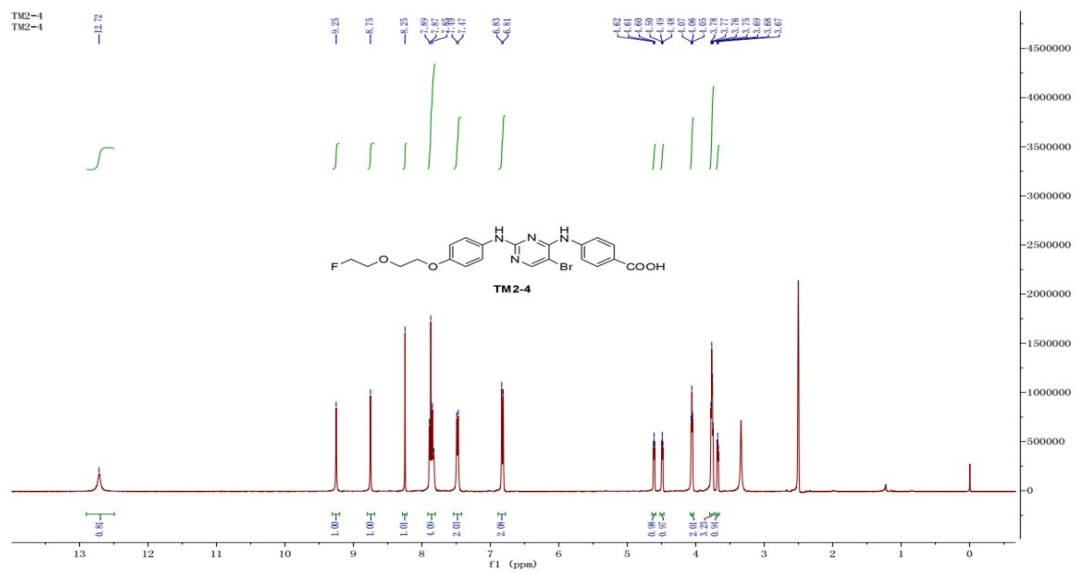





HRMS (ESI) of **8i**:

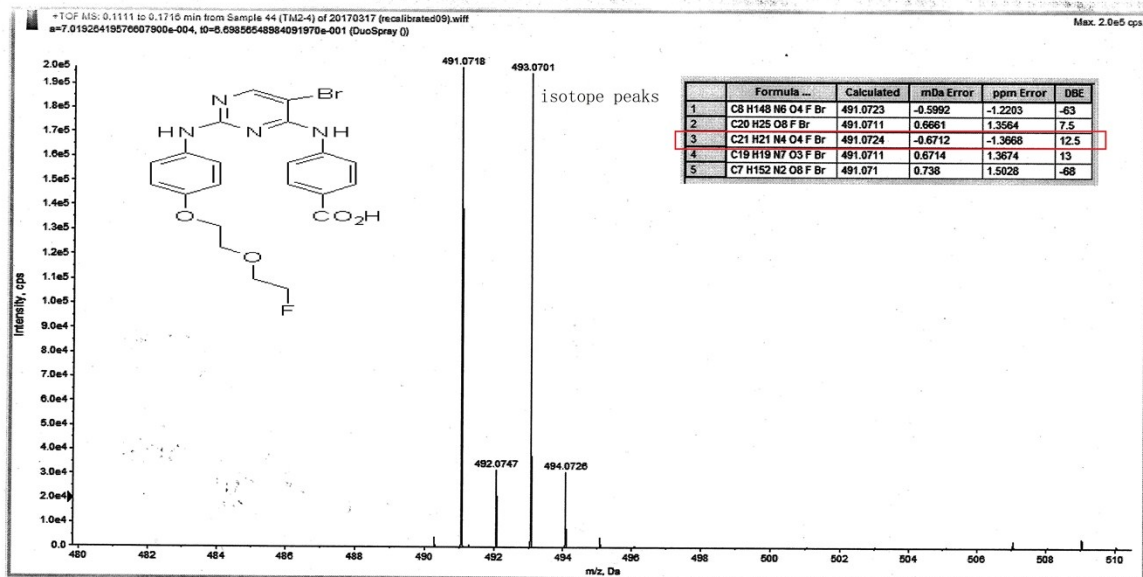

# ESI-MS of crude 3:

ESI-MS analysis of crude reaction mixture

ESI-MS Spectrum, 097-L-1-1

#1 Ret.Time:Averaged 1.280-1.733(Scan#:49-66)  
Mass Peaks:753 Base Peak:308.15(313072) Polarity:Pos Segment1 - Event1  
Intensity

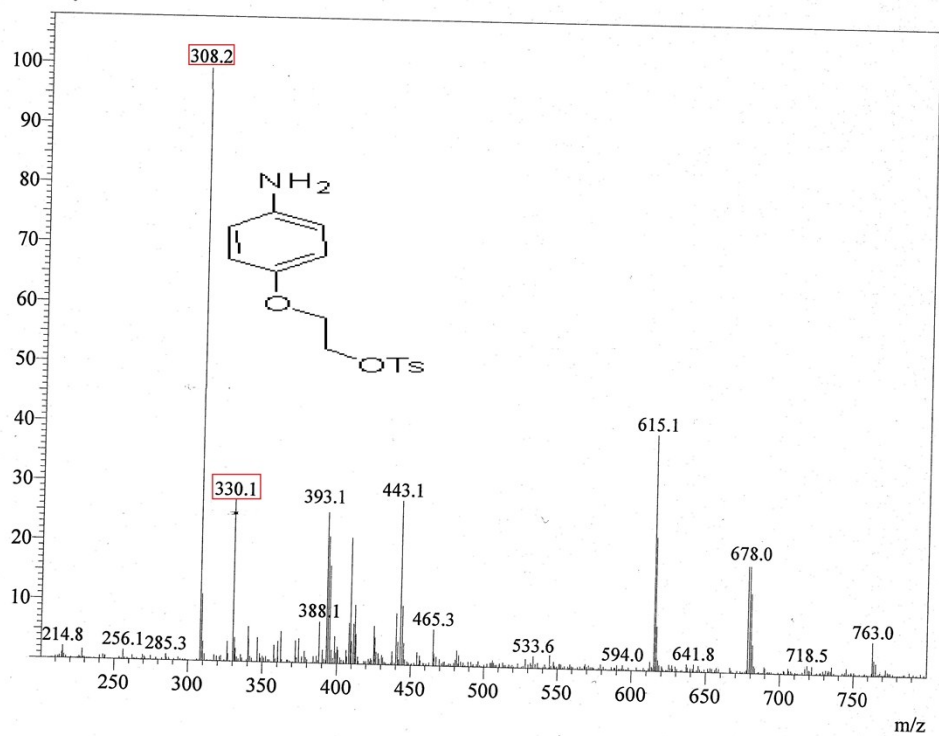

Molecular docking of 8i:

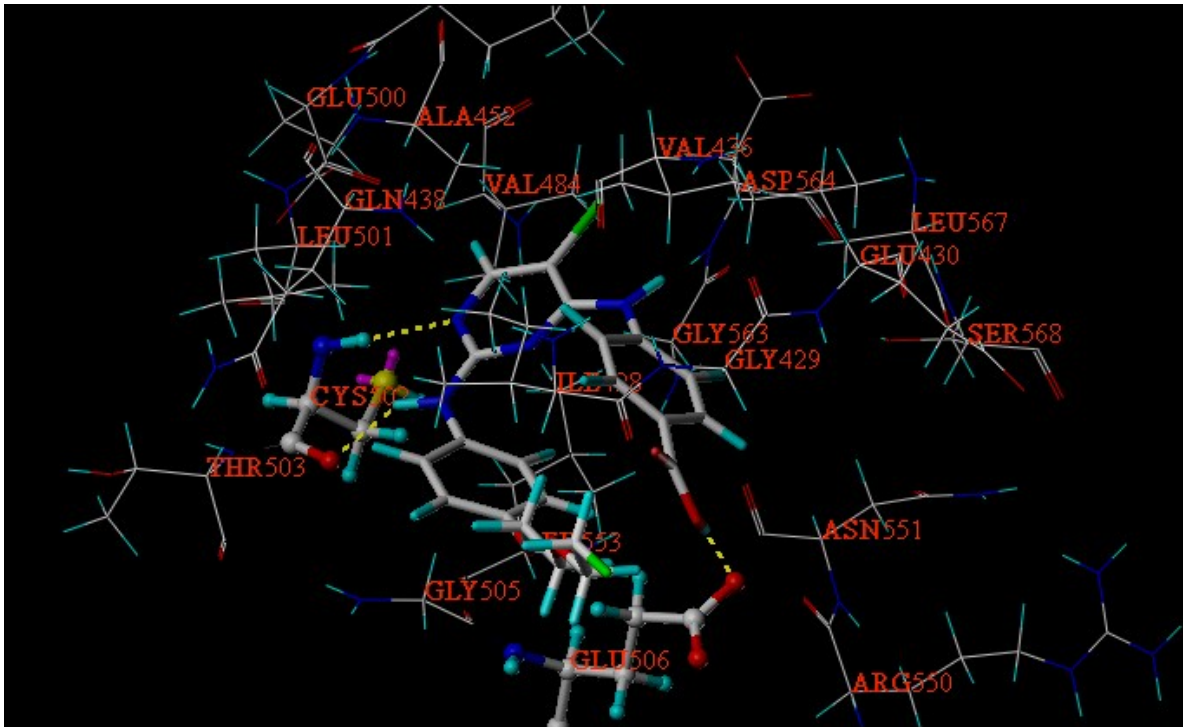

Molecular docking of 8d:

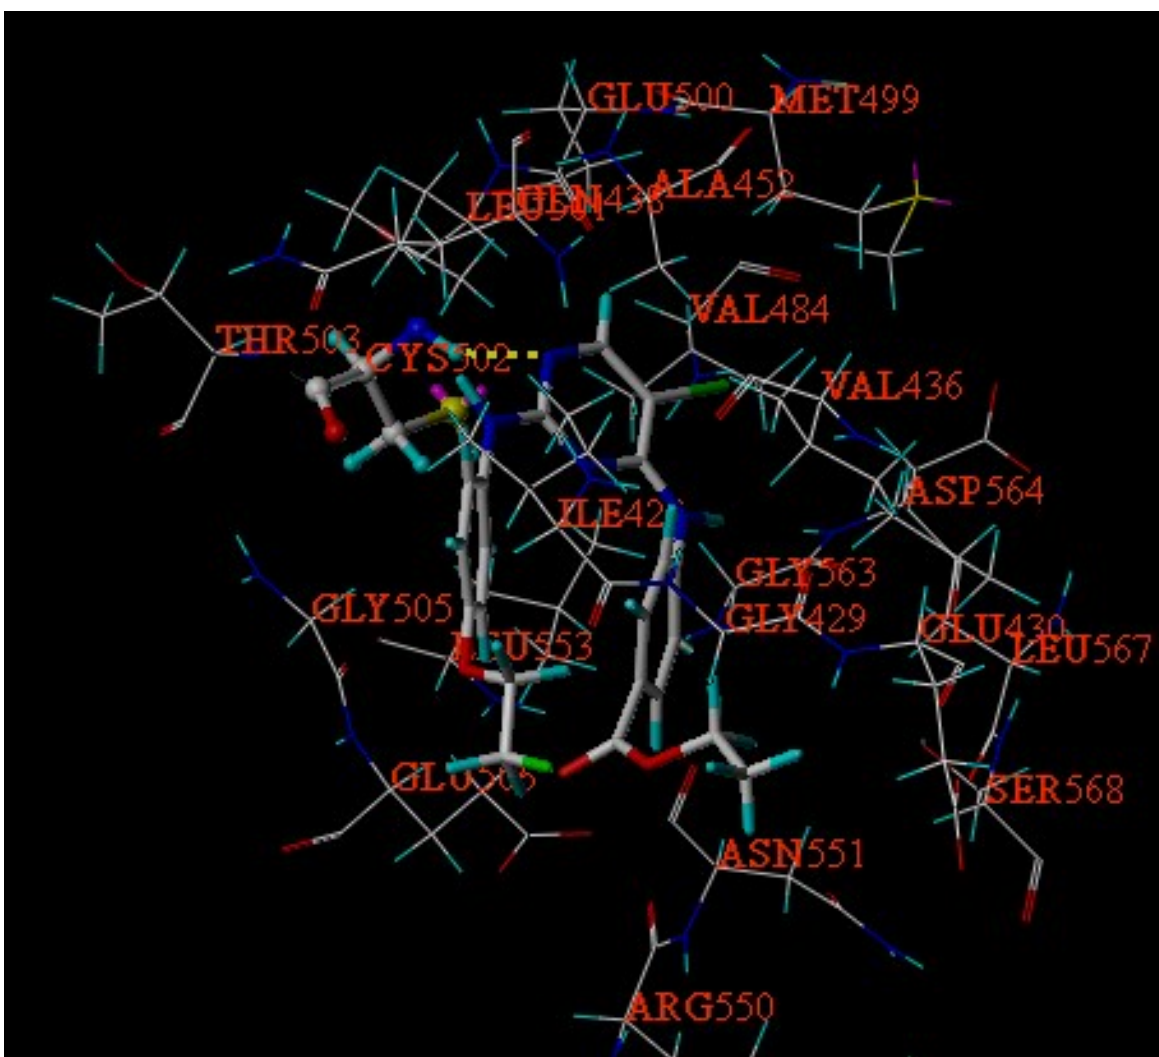

Biodistribution of [<sup>18</sup>F]-8h in mice bearing S180 tumor

| ID% (g <sup>-1</sup> ) | Time (min) |           |           |           |           |
|------------------------|------------|-----------|-----------|-----------|-----------|
|                        | 5          | 15        | 30        | 60        | 120       |
| Blood                  | 0.17±0.02  | 0.14±0.02 | 0.19±0.03 | 0.07±0.01 | 0.13±0.01 |
| Brain                  | 0.15±0.03  | 0.08±0.02 | 0.09±0.01 | 0.13±0.02 | 0.11±0.01 |
| Heart                  | 1.13±0.03  | 0.35±0.04 | 0.27±0.02 | 0.26±0.02 | 0.40±0.03 |
| Liver                  | 3.17±0.12  | 1.30±0.22 | 0.65±0.14 | 0.31±0.02 | 0.43±0.02 |
| Spleen                 | 0.24±0.06  | 0.23±0.01 | 0.15±0.03 | 0.22±0.01 | 0.13±0.02 |
| Lung                   | 1.05±0.12  | 0.35±0.01 | 0.27±0.01 | 0.31±0.02 | 0.28±0.04 |
| Kidney                 | 1.03±0.20  | 0.26±0.03 | 0.04±0.02 | 0.18±0.04 | 0.20±0.04 |
| Muscle                 | 0.36±0.04  | 0.30±0.04 | 0.31±0.08 | 0.27±0.04 | 0.48±0.04 |
| Bone                   | 0.59±0.07  | 0.57±0.10 | 0.69±0.05 | 0.94±0.01 | 0.98±0.06 |
| Intestine              | 2.49±0.36  | 1.44±0.06 | 1.80±0.34 | 1.23±0.12 | 0.34±0.06 |
| Stomach                | 0.30±0.03  | 0.67±0.03 | 0.14±0.03 | 0.15±0.02 | 0.14±0.02 |
| Tumor                  | 0.52±0.03  | 0.67±0.01 | 0.90±0.02 | 0.64±0.09 | 0.74±0.04 |
| Tumor/Muscle           | 1.44       | 2.23      | 2.90      | 2.37      | 1.54      |
| Tumor/Bone             | 0.88       | 1.18      | 1.30      | 0.68      | 0.76      |
| Tumor/Blood            | 3.06       | 4.79      | 4.74      | 9.14      | 5.69      |

Biodistribution of [<sup>18</sup>F]-8i in mice bearing S180 tumor

| ID% (g <sup>-1</sup> ) | Time (min) |           |           |           |           |
|------------------------|------------|-----------|-----------|-----------|-----------|
|                        | 5          | 15        | 30        | 60        | 120       |
| Blood                  | 0.79±0.10  | 0.60±0.11 | 0.37±0.01 | 0.37±0.03 | 0.28±0.09 |
| Brain                  | 0.32±0.10  | 0.17±0.02 | 0.26±0.05 | 0.17±0.03 | 0.20±0.01 |
| Heart                  | 1.41±0.25  | 0.53±0.04 | 0.54±0.09 | 0.50±0.07 | 0.47±0.06 |
| Liver                  | 12.77±0.16 | 6.51±0.47 | 2.46±0.22 | 1.14±0.11 | 0.83±0.07 |
| Spleen                 | 0.90±0.06  | 0.53±0.03 | 0.57±0.05 | 0.36±0.03 | 0.23±0.02 |
| Lung                   | 1.25±0.17  | 0.68±0.07 | 0.36±0.06 | 0.44±0.02 | 0.39±0.02 |
| Kidney                 | 4.39±0.15  | 2.63±0.29 | 2.52±0.18 | 0.96±0.13 | 0.35±0.05 |
| Muscle                 | 0.96±0.08  | 0.85±0.17 | 0.52±0.02 | 0.61±0.01 | 0.70±0.06 |
| Bone                   | 0.71±0.10  | 0.90±0.15 | 0.52±0.04 | 0.52±0.09 | 0.83±0.11 |
| Intestine              | 0.79±0.11  | 3.90±0.53 | 0.98±0.15 | 0.52±0.07 | 0.58±0.04 |
| Stomach                | 0.20±0.03  | 0.31±0.05 | 0.98±0.02 | 0.48±0.06 | 0.35±0.02 |
| Tumor                  | 1.35±0.18  | 1.82±0.05 | 1.22±0.12 | 1.08±0.06 | 0.67±0.09 |
| Tumor/Muscle           | 1.41       | 2.14      | 2.35      | 1.77      | 0.96      |
| Tumor/Bone             | 1.90       | 2.02      | 2.35      | 2.08      | 0.81      |
| Tumor/Blood            | 1.71       | 3.03      | 3.30      | 2.92      | 2.39      |

Biodistribution of [<sup>18</sup>F]-8c in mice bearing S180 tumor

| ID% (g <sup>-1</sup> ) | Time (min) |            |           |           |           |
|------------------------|------------|------------|-----------|-----------|-----------|
|                        | 5          | 15         | 30        | 60        | 120       |
| Blood                  | 3.59±0.03  | 3.40±0.13  | 3.62±0.12 | 4.45±0.08 | 4.34±0.05 |
| Brain                  | 2.92±0.13  | 2.79±0.08  | 2.20±0.11 | 2.87±0.14 | 2.95±0.08 |
| Heart                  | 4.96±0.36  | 3.22±0.48  | 2.51±0.19 | 3.25±0.17 | 3.72±0.26 |
| Liver                  | 10.36±0.30 | 11.62±0.69 | 9.35±0.28 | 5.59±0.39 | 4.62±0.09 |
| Spleen                 | 10.03±0.49 | 7.40±0.24  | 5.14±0.23 | 4.37±0.11 | 3.43±0.17 |
| Lung                   | 7.26±0.23  | 5.22±0.04  | 4.86±0.30 | 3.30±0.05 | 3.20±0.24 |
| Kidney                 | 4.50±0.32  | 3.04±0.16  | 2.69±0.22 | 2.87±0.15 | 2.46±0.08 |
| Muscle                 | 3.57±0.06  | 2.93±0.26  | 2.38±0.11 | 2.97±0.33 | 3.05±0.23 |
| Bone                   | 3.63±0.18  | 2.95±0.04  | 3.53±0.11 | 4.49±0.19 | 4.02±0.39 |
| Intestine              | 0.45±0.03  | 0.62±0.06  | 0.31±0.02 | 0.39±0.01 | 0.36±0.06 |
| Stomach                | 0.77±0.04  | 0.72±0.03  | 0.77±0.05 | 0.78±0.04 | 0.76±0.01 |
| Tumor                  | 3.54±0.23  | 3.22±0.38  | 3.73±0.08 | 4.57±0.54 | 4.46±0.51 |
| Tumor/Muscle           | 0.99       | 1.10       | 1.57      | 1.54      | 1.46      |
| Tumor/Bone             | 0.98       | 1.09       | 1.06      | 1.02      | 1.11      |
| Tumor/Blood            | 0.99       | 0.95       | 1.03      | 1.03      | 1.03      |
